# Supplementary material for: Relationship between serum osteocalcin/undercarboxylated osteocalcin and type 2 diabetes: a systematic review/meta-analysis study protocol
Source: PubMed Central journal article supplement — BMJ Open. 2019 Mar 12;9(3):e023918. doi: 10.1136/bmjopen-2018-023918 (PMC6429918; doi:10.1136/bmjopen-2018-023918), 2019-03-12
Supplement: bmjopen-2018-023918.draft_revisions.pdf [file bmjopen-2018-023918.draft_revisions.pdf]

# BMJ Open

BMJ Open is committed to open peer review. As part of this commitment we make the peer review history of every article we publish publicly available.

When an article is published we post the peer reviewers' comments and the authors' responses online. We also post the versions of the paper that were used during peer review. These are the versions that the peer review comments apply to.

The versions of the paper that follow are the versions that were submitted during the peer review process. They are not the versions of record or the final published versions. They should not be cited or distributed as the published version of this manuscript.

BMJ Open is an open access journal and the full, final, typeset and author-corrected version of record of the manuscript is available on our site with no access controls, subscription charges or pay-per-view fees (<http://bmjopen.bmj.com>).

If you have any questions on BMJ Open's open peer review process please email [info.bmjopen@bmj.com](mailto:info.bmjopen@bmj.com)

# BMJ Open

## THE ROLE OF OSTEOCALCIN IN PATIENTS WITH TYPE 2 DIABETES: A SYSTEMATIC REVIEW AND META-ANALYSIS STUDY PROTOCOL

|                               |                                                                                                                                                                                                                                                                                                                                                                                                                                                                                                                                   |
|-------------------------------|-----------------------------------------------------------------------------------------------------------------------------------------------------------------------------------------------------------------------------------------------------------------------------------------------------------------------------------------------------------------------------------------------------------------------------------------------------------------------------------------------------------------------------------|
| Journal:                      | <i>BMJ Open</i>                                                                                                                                                                                                                                                                                                                                                                                                                                                                                                                   |
| Manuscript ID                 | bmjopen-2018-023918                                                                                                                                                                                                                                                                                                                                                                                                                                                                                                               |
| Article Type:                 | Protocol                                                                                                                                                                                                                                                                                                                                                                                                                                                                                                                          |
| Date Submitted by the Author: | 07-Jun-2018                                                                                                                                                                                                                                                                                                                                                                                                                                                                                                                       |
| Complete List of Authors:     | Liu, Yihui; Children's Hospital at Westmead, chronic kidney disease; The University of Sydney, Public Health<br>Liu, Xiaoying; The University of Sydney, Public Health<br>R. Lewis, Joshua; Children's Hospital at Westmead Centre for Kidney Research, Centre for Kidney Research<br>Brock, Kaye; University of Sydney, Physiology<br>C.Brennan-Speranza, Tara; The University of Sydney, Physiology<br>Teixeira-Pinto, Armando; The University of Sydney, Screening and Test Evaluation Program (STEP), School of Public Health |
| Keywords:                     | osteocalcin, type 2 diabetes, prediabetes, meta-analysis                                                                                                                                                                                                                                                                                                                                                                                                                                                                          |
|                               |                                                                                                                                                                                                                                                                                                                                                                                                                                                                                                                                   |

SCHOLARONE™  
Manuscripts

1  
2  
3 **THE ROLE OF OSTEOCALCIN IN PATIENTS WITH TYPE 2**  
4 **DIABETES: A SYSTEMATIC REVIEW / META-ANALYSIS STUDY**  
5  
6 **PROTOCOL**  
7  
8  
9

10  
11 **Yihui Liu<sup>1,2</sup>, Xiaoying Liu<sup>2</sup>, Joshua Lewis<sup>1,3</sup>, Kaye Brock<sup>4</sup>, Tara Brennan-Speranza<sup>4</sup>,**  
12 **Armando Teixeira-Pinto<sup>1,2\*</sup>**  
13  
14

15  
16  
17 **Affiliations:** <sup>1</sup>Centre for Kidney Research, The Children's Hospital at Westmead, Australia

18  
19 <sup>2</sup> School of Public Health, Faculty of Medicine, The University of Sydney, Australia,

20  
21 <sup>3</sup> School of Biomedical Sciences, The University of Western Australia

22  
23 <sup>4</sup> Department of Physiology, Faculty of Medicine, The University of Sydney, Australia.  
24  
25  
26  
27

28 **Address correspondence to** Armando Teixeira-Pinto, Edward Ford Building (A27), Office  
29  
30 226A, The University of Sydney, NSW 2006, Australia, [armando.teixeira-](mailto:armando.teixeira-pinto@sydney.edu.au)  
31 [pinto@sydney.edu.au](mailto:armando.teixeira-pinto@sydney.edu.au), +61 2 9351 5424.  
32  
33  
34  
35  
36  
37  
38  
39  
40  
41  
42  
43  
44  
45  
46  
47  
48  
49  
50  
51  
52  
53  
54  
55  
56  
57  
58  
59  
60

**Word count: 2424**

## ABSTRACT

### Introduction

Type 2 diabetes (T2DM) is more often associated with lifestyle factors in recent years and becoming an economic and disease burden for countries globally. Novelty findings to the preventive factors from bone for abnormal metabolic outcomes had been reported. Two mice-model studies in 2007 and 2008 indicated that osteocalcin, as a bone formation marker, may also affect glucose homeostasis and obesity measurements. Since then, many research groups developed observational studies about relationships between osteocalcin (OC) and metabolic outcomes. However, results in human studies remain controversial, with several reviews suggesting that OC may play a protective role in the development of T2DM but with a sizeable unexplained heterogeneity across studies.

### Methods and analysis

We will conduct a systematic review including a meta-analysis to compare OC levels in patients with T2DM, prediabetes and standard glucose controls, and to further investigate associations between OC and risk of developing T2DM. This review will comprehensively evaluate possible explanatory factors for the heterogeneity observed in previous meta-analyses. We include observational studies which reported interested associations between OC and T2DM in adult humans. A literature search was conducted in March 2017 and will be updated in early 2018 in three databases (MEDLINE, EMBASE, and SCOPUS) without language restrictions or time limitations. Two reviewers independently screen the titles and abstracts and conduct a full-text assessment to exclude ineligible studies. Meeting with a third reviewer to address discrepancies. A single reviewer will perform the data extraction. Eligible extracted data will be pooled to meta-analyses to evaluate the interested associations and assess resources for heterogeneity if permitted. This study will report items in line with guidelines in PRISMA and MOOSE (25,26).

**Registration number in PROSPERO:** CRD42017073127

**Keywords:** osteocalcin, type 2 diabetes, prediabetes, meta-analysis

### Strengths and limitations of this study

- This review will include more eligible studies (especially of prospective studies) and increase the number of available participants.
- This review will be the first study thoroughly investigating heterogeneity in the relationships between OC and T2DM with an advanced technical method of Rstudio.
- The methods of the review analysis two forms of OC (TOC and ucOC) that may specify the actual endocrine function of OC in humans.
- The design of the review considers an early stage of diabetes which indicate the relationship between OC and impaired glucose metabolism in a progressive level.
- The main limitation of the current study is that there is no qualitative assessment in this review so studies having a poor quality will not be excluded, and it may affect the study results to some extent.

## INTRODUCTION

Type 2 diabetes (T2DM) is a preventable disease, but its prevalence has been increasing in the past four decades. This chronic disease, also known as non-insulin-dependent diabetes, results from insulin resistance and is associated with modifiable lifestyle risk factors (1, 2). People with risk factors, such as overweight or obese, inadequate physical activity and inappropriate diet, may develop T2DM via a progressive condition (1-3). There are growing cases of T2DM not only in high-income countries but also in developing countries. In the United States, about 29 million people had diabetes in 2012(4), and 86 million adults had prediabetes (5). Besides, WHO reported that diabetes cases might have a massive increase in developing countries in next decades, rising from 115 million in 2000 to 284 million in 2030 (6). Furthermore, the cost for T2DM treatments has become a severe economic burden in global. Expenditures due to the right medications on T2DM ranged from about \$242 to \$11,917 across countries (6).

Osteocalcin(OC), a bone turnover marker from osteoblast, has been found that may have an effect on glucose metabolism except for its natural functions in the skeleton. By nature, OC plays a role in bone remodeling, bone mineralization and calcium<sup>2+</sup> homeostasis (7). In last decades, it was shown, by two mice-model studies, that OC could regulate glucose homeostasis by stimulating beta cell proliferation and adiponectin secretion (7, 8). Furthermore, there are two forms of OC: the carboxylated osteocalcin (cOC) and undercarboxylated osteocalcin (ucOC) (8, 9). Also, ucOC is the active form of OC, and the experiments focused on investigating the functions of both total osteocalcin (TOC) and ucOC in energy homeostasis (9, 10). Since then, clinical observations conducted in humans have been contributing to investigations of OC and energy metabolism in different population groups, according to their disease conditions, sex difference or regions. The results are still conflicting (11-16).

Several systematic reviews/meta-analyses got published in recent years, but with different conclusions and great unexplained heterogeneity among studies. They reported that OC might play a role in whole-body energy metabolism (17-20). The findings of three recent systematic reviews support this hypothesis by concluding that patients with T2DM had a significantly lower OC levels compared with normal glucose controls (mean difference [95%CI] of OC (ng/ml) and p-value for each review: -3.31[-4.04, -2.57], p<0.001; -2.87 [-

1  
2  
3 3.76, -1.98],  $p < 0.001$ ; -2.51[-3.01-2.01]),  $p < 0.001$ ). Another review found very similar levels  
4 of OC in T2DM and healthy controls (mean difference[95%CI] of OC (ng/ml): -0.80[-  
5 1.64,0.03],  $p = 0.06$ ) (21). The reviews explored different sources of heterogeneity but with  
6 modest success. Starup-Linde et al. conducted subgroup analysis according to menopausal  
7 status in women, sex, and age (21). Liu C et al. attempted to explain the heterogeneity by sex  
8 and OC assay methods (22). Kunutsor et al. conducted subgroups analysis according to study  
9 design and degree of confounders of risk estimates (23). Hygum et al. performed a meta-  
10 regression analysis to investigate how much heterogeneity was explained by the  
11 Haemoglobin A1c(HbA1c) levels (24). Additionally, as reported by Liu et al., the number of  
12 studies which investigated the association between ucOC and T2DM were limited and  
13 needed further investigation (22). Therefore, this present review aims collect more evidence  
14 of TOC and ucOC in patients with T2DM and comprehensively explore possible factors that  
15 can explain the heterogeneity of the results across studies.  
16  
17  
18  
19  
20  
21  
22  
23  
24

## 25 **OBJECTIVES**

26  
27 The primary objective is to determine the associations between TOC and ucOC and the  
28 incidence of T2DM and to investigate the possible resources for heterogeneity. The  
29 secondary aim is to examine this association in patients with prediabetes and the potential  
30 remedies for heterogeneity.  
31  
32  
33  
34

## 35 **METHODS & ANALYSIS**

36  
37 We designed this study in adherence to the guideline of Preferred Reporting Items for  
38 Systematic review and Meta-analysis (PRISMA) and Meta-analysis of observational studies  
39 in epidemiology (MOOSE) (25, 26). The process of the proposed protocol shows in Figure.1,  
40 and PRISMA-checklist shows in Appendix 1.  
41  
42  
43  
44  
45

### 46 **Protocol and registration**

47  
48 This protocol is registered and available on PROSPERO (CRD42017073127).  
49  
50

### 51 **Patient and public involvement statement**

52  
53 There is no patient or public involved in this systematic review/meta-analysis.  
54  
55  
56  
57  
58  
59  
60

## Eligibility criteria for studies included in the review

### *Inclusion and exclusion criteria*

#### A. Participants:

Participants should be adult humans (older than 18 years old), with T2DM at baseline or developed T2DM afterward; not have any conditions that can affect bone metabolism or with medications that affect bone metabolism; could be with anti-diabetic treatments.

#### Exclude:

1. Children or adolescents (younger than 18 years old), pregnant or lactating women because of altered bone turnover markers levels.
2. Patients with a particular disease(s) that either affects bone metabolism or glucose metabolism:
3. Patients with type 1 diabetes and gestational diabetes as they are pathophysiological different compared with T2DM.
4. Patients with Cushing's disease or Cushing's syndrome as they have a disordered metabolism.
5. Patients with hormonal disorders. For instance, growth-hormone deficiency.
6. Patients with hyperparathyroidism or hypoparathyroidism or other diseases affect thyroid function because of increased OC levels.
7. Patients with liver dysfunction (alanine transaminase > 3 times upper limit of normal).
8. Patients with impaired kidney function as mentioned below:
  - A chronic renal disease when glomerular filtration rate of impaired renal function patients below 30ml/min • 1.73 m<sup>2</sup> at stage four or five, or
  - A chronic renal illness when serum creatinine over 2.07 mg/dL, or renal osteodystrophy, or kidney transplant as 21% to 50% kidney transplant recipients may develop secondary hyperparathyroidism after kidney transplantation or treated with dialysis or hemodialysis.
9. Patients with Paget's disease as they have disorder bone metabolism.
10. Patients with cancer or tumors. For example, bone cancer metastases could mediate bone turnover markers levels.
11. Patients with human immunodeficiency virus (HIV).
12. Patients with medications that affect bone metabolism:



- Antiresorptive therapy for osteoporosis and selective estrogen receptor modulators (such as bisphosphonates, alendronate, etidronate, and raloxifene).
- Estrogen replacement therapy.
- Glucocorticoids and thiazide diuretics.

13. Patients treated with surgery that directly affected hormone or thyroid function (i.e., thyroidectomy, oophorectomy and hysterectomy).

Note: We include intervention study that reported baseline data of OC and T2DM. Accordingly, we will eliminate observational studies with more than 20% of the cohort taking above non-eligible therapy.

#### B. Study types:

Observational studies are eligible to include, including cohort study, case-control study and cross-sectional study. Reporting eligible exposure(s) and outcome(s).

Exclude reviews, commentaries, short survey, case reports, and letters.

#### Exposure(s)

OC levels identified from enzyme-linked immunoassay (ELISA or EIA), Electrochemiluminescence immunoassay (ECLIA), Immunoradiometric assay (IRMA), radioimmunoassay (RIA), hydroxylapatite binding assay (HAP). The standard unit for OC is ng/ml; thus other presented groups for OC (eg.nmol/l) will be converted to ng/ml.

Measures of OC:

- Total serum osteocalcin levels (ng/ml).
- Undercarboxylated osteocalcin levels(ng/ml).
- OC categorized as low (reference) and high groups. Tertile, quartile, or quantile are the common categories used for classing different levels of TOC or ucOC.

#### Outcome(s)

Measures of T2DM;

- Diabetes status categorized as type 2 diabetes disease or normal controls (reference)
- As some studies may categorize diabetes states as insulin-dependent diabetes mellitus (IDDM) and non-insulin dependent diabetes mellitus (NIDDM), NIDDM will be used and presented as T2DM.

Exclude Type 1 diabetes and gestational diabetes as they are pathophysiological different compared with T2DM.

## Secondary outcome(s)

- IGT /IFG that is the pre-diabetic state and has a higher risk of developing T2DM
- HbA1c percentages categorized as type 2 diabetes, prediabetes and healthy controls (reference) by HbA1c rates over 6.5%, between 5.7% and 6.5% and below 5.7% respectively.
- Fasting plasma glucose levels categorized as diabetes, prediabetes and healthy controls(reference) by FPG levels over 126mg/dl, between 100 and 126 mg/dl, and below 100 mg/dl respectively.

## STUDY DESIGN

### Search strategies

A comprehensive literature search within MEDLINE, EMBASE and SCOPUS databases will be conducted to source all possibly relevant studies for the present review. There is no language restriction, and non-English articles will be translated when possible and evaluated for eligibility. There is no time restriction. We might include conferences in proceeding and abstracts if necessary. Hand search will conduct reference lists of each available paper. If duplicate publications of the same study are retrieved, most relevant and up to date paper with more complete data will be included. The detailed search strategy shows in Table.1.

**Table 1. Detailed search strategy in databases: Medline, Embase and Scopus.**

| Medline (Ovid SP)          | Embase (Ovid SP)              | Scopus                                        |
|----------------------------|-------------------------------|-----------------------------------------------|
| 1. exp osteocalcin         | 1. exp osteocalcin            | ( KEY ( 'osteocalcin' )                       |
| 2. osteocalcin.mp          | 2. osteocalcin.mp             | OR KEY ( 'bone AND gla AND protein' )         |
| 3. bone gla protein.mp     | 3.bone gla protein.mp         | OR KEY ( 'bone AND turnover AND markers' ) )  |
| 4. vitamin k?dependent     | 4.vitamin k?dependent         | AND ( KEY ( 'diabetes AND mellitus' )         |
| bone protein*.mp           | bone protein*.mp              | OR KEY ( 'hemoglobin AND a1c' )               |
| 5. 1 and 2 and 3 and 4     | 5. 1 and 2 and 3 and 4        | OR KEY ( 'fasting AND plasma AND glucose' ) ) |
| 6. exp diabetes mellitus,  | 6. exp non insulin            | AND KEY ( 'human' ) AND ( LIMIT-              |
| Type 2/II                  | dependent diabetes            | TO ( DOCTYPE , "ar" ) )                       |
| 7.diabetes mellitus type   | mellitus                      |                                               |
| 2/II.mp                    | 7. exp diabetes mellitus 2/II |                                               |
| 8. (T2D* or NIDDM or       | 8. (T2D* or NIDDM or "type    |                                               |
| "type 2" or "type II").tw  | 2" or "type II").tw           |                                               |
|                            | 9. (prediabet* or pre         |                                               |
| 9. (non insulin\$ depend\$ | diabet*).tw                   |                                               |
| or nonsulin\$depend\$ or   | 10. hyperglyc?emi*.tw         |                                               |
| non insulin?depend\$ or    | 11. 6 or 7 or 8 or 9 or 10    |                                               |

---

|    |                            |                            |
|----|----------------------------|----------------------------|
| 1  |                            |                            |
| 2  |                            |                            |
| 3  | noninsulin?depend\$).tw    | 12. 5 and 11               |
| 4  | 10.exp Hyperglycemia       | 13. limit 13 to (human and |
| 5  | 11. hyperglycemia.mp       | exclude medline journals)  |
| 6  | 12. hypergly?emi*.tw       |                            |
| 7  | 13. exp Hemoglobin A/ or   |                            |
| 8  | exp Hemoglobin A,          |                            |
| 9  | Glycosylated               |                            |
| 10 | 14. HbA1c.mp               |                            |
| 11 | 15. ("HbA(1c)" or HbA1c    |                            |
| 12 | or "HbA 1c" or             |                            |
| 13 | ((glycosylated or glyated) |                            |
| 14 | adj h?emoglobin)).tw       |                            |
| 15 | 16. 6 or 7 or 8 or 9 or 10 |                            |
| 16 | or 11 or 12 or 13 or 14 or |                            |
| 17 | 15                         |                            |
| 18 | 17. 5 and 16               |                            |
| 19 | 18. limit 17 to humans     |                            |
| 20 |                            |                            |
| 21 |                            |                            |

---

### Process for selecting studies

One author set up the search strategy and store search results to Endnote X7, then the search strategy and recorded search results will be checked by another investigator. Two and more independent investigators will go through the abstract screening (remove duplicate records of the same report; include eligible articles), and full-text assessment (acquire full-text of available studies, construct citation lists of eligible items). If a discrepancy arises, disagreement will be shared with investigators by email or face-to-face meetings and make a final decision.

### DATA EXTRACTION

One author will extract data from studies that are eligible for full-text assessment. Obtained data will be examined for a second time by the same author to correct any mistake. All extracted data are saved in an excel sheet.

Eligible extracted items: author and publication year, study design, study base, sample size, sex and postmenopausal status in female, age, ethnicity, country, osteocalcin assay methods, obesity measurements (BMI or WC), diabetic duration, anti-diabetic medications status, VK supplementation/anti-VK drugs, VD supplementation, TOC/ucOC levels in groups, any risk estimate between TOC/ucOC and T2DM, any association between TOC/ucOC and HbA1c and/or FPG in T2DM, any association between TOC/ucOC and

1  
2  
3 prediabetes and/or IGT, any association between TOC/ucOC and standard glucose controls,  
4 any association between TOC/ucOC and HOMA-IR or HOMA-beta in T2DM.  
5  
6

## 7 8 **STATISTICAL ANALYSIS & DATA SYNTHESIS**

9  
10 Mean differences (MDs) with 95%CI of TOC/ucOC are produced regarding T2DM, or  
11 prediabetes and standard glucose controls. Estimates of effect size will be expressed as  
12 Relative Risk (RR) with 95% confidence intervals (95% CI) in cohort study and Odds Ratio  
13 (OR) with 95% CI in case-control and cross-sectional study. OR is expressed as one increase  
14 standard deviation (SD) of OC to the risk of developing T2DM. Pearson correlation  
15 coefficient will be analyzed by investigating the relationships between TOC or ucOC and  
16 fasting insulin levels (FINS). Studies that only have medians and ranges or interquartile  
17 ranges (IQRs) will be transformed to means and standard deviations (27, 28). Furthermore,  
18 log-transformed data will be converted to raw statistics before applying to analyses (29). We  
19 will assess publication bias of MD and risk estimates by visual inspection of the funnel plots  
20 (30). We will additionally examine heterogeneity employing the  $I^2$  statistic by study ID  
21 which quantifies inconsistency across studies to assess the impact of heterogeneity on the  
22 meta-analysis (31).  $I^2$  represents the degree of heterogeneity.  $I^2$  thresholds of 0%-40%, 30%-  
23 60%, 50%-90% and 75%-100% indicate possibilities of low, moderate, substantial and be  
24 considerable heterogeneity (31). All meta-analyses are conducted by Rstudio (Version  
25 1.1.419-2009-2019 Rstudio, Inc.). Metafor package will be used to produce meta-regression  
26 analyses, meta-bias analyses and assessing heterogeneities (32). Each P value below 0.05  
27 indicates statistically significant.  
28  
29  
30  
31  
32  
33  
34  
35  
36  
37  
38  
39

### 40 **Risk of bias assessment**

41  
42 In this review, we will assess the risk of bias by subgroup analysis based on study type.  
43 Although Newcastle Ottawa Scale (NOS) is the frequently applied tools for quality appraisal  
44 of individual study in a meta-analysis of observational studies, we found that subgroup  
45 analysis based on study design may be more feasible in this case than using NOS tools.  
46 According to previously published reviews, it is acknowledged that there are significantly  
47 more cross-sectional studies than prospective studies had been identified. Also, with  
48 considering the characteristics of NOS tools that was constructed based on the study  
49 methodology, subgroup analysis with study type may provide a similar risk of bias result as  
50  
51  
52  
53  
54  
55  
56  
57  
58  
59  
60

NOS produced (34). Thereby, we believed it makes sense to apply subgroup analysis with study type to save time and optimal assessment methods.

### **Subgroup analysis and investigation of heterogeneity**

As there is no quality assessment of individual study in this review, the risk of bias will be measured by subgroup analysis. We will use subgroup analyses to identify the single characteristic of studies concerning heterogeneity. Meta-regression will be used for continuous factors and also combine different explaining heterogeneity. Random-effects models will be used, and p-values of  $< 0.01$  will be considered statistically significant for subgroup analyses. Pre-planned subgroup analyses to explore statistical heterogeneity will include stratification by:

- Subgroups based on study design.
- Subgroups based on sex. Additionally, a subset based on menopausal will be conducted in females.
- Subgroups based on ethnicity or race.
- Subgroups based on diabetic status (normal, prediabetes, T2DM).
- Subgroups based on anti-diabetic medication status in T2DM.
- Subgroups based on obesity measurements (BMI/WC).
- Subgroups based on OC assay methods.
- Subgroups based on VK supplementation/anti-VK drugs or VD supplementation if data available.

### **Publication bias & Confidence in cumulative evidence**

Publication bias assessment is based on by graphical test (funnel plots) and Egger & Begg tests (30,33). The asymmetry of funnel plot suggests a higher risk of publication bias and vice versa (30). Statistically, Egger and Begg's test will be conducted respectively in Rstudio.

We will provide the confidence in results by applying the Grading of Recommendations Assessment Development and Evaluation (GRADE) tool. We also will present an evidence profile summary with GRADEpro software (<http://ims.cochrane.org/grade>). Considering items are the risk of bias with subgroup analysis with study type, consistency of results, directness of evidence and precision of the results.

## **DISCUSSION**

1  
2  
3 The current systematic review/meta-analysis is strengthened in several ways. Firstly, we  
4 will provide more evidence to previous investigations in analyzing OC's potential roles in  
5 T2DM by increasing the number of eligible studies and make an up-to-date analysis.  
6 Secondly, investigating the sources of heterogeneity explicitly by more possible factors, such  
7 as age, sex, postmenopausal status in women, study design, ethnicity or regions, OC assays  
8 and medications on T2DM. This comprehensive analysis on heterogeneity may find out the  
9 factor(s) that responses for the difference among studies. Thirdly, producing a report not only  
10 in total osteocalcin (TOC) levels but also in undercarboxylated osteocalcin (ucOC) levels. By  
11 including investigations on ucOC, it might be clearer that which form of OC plays the  
12 endocrine role in humans. Additionally, investigating the relationship in a subgroup of  
13 patients with prediabetes would give more detail about how OC influence glucose levels in a  
14 progressive T2DM status. The major limitation of this review is that we will only be  
15 including observational studies because there is insufficient evidence from clinical trials,  
16 which will restrict study result in specific analysis. As quality assessments are not conducted  
17 in our current study, it may bias our study results because included studies with poor quality  
18 cannot be assessed. Despite disadvantages, there still be a large number of studies that could  
19 be used to pool a quantitative analysis and provide evidence according to heterogeneity  
20 problems. Our review will contribute to public health and clinical researchers for further  
21 investigations regards of the gap in the current literature.  
22  
23  
24  
25  
26  
27  
28  
29  
30  
31  
32  
33

### 34 **Conflicts of interests**

35  
36 All authors declare that there is no conflict of interests in this study protocol.  
37  
38

### 39 **Data statement**

40  
41 Technical appendix, statistical code, and dataset available from the Figshare repository,  
42  
43 DOI: [10.6084/m9.figshare.6199364].  
44  
45

### 46 **Funding**

47 Armando Teixeira-Pinto is partially supported by the NHMRC Program Grant BeatCKD  
48 [APP1092957].  
49  
50

### 51 **Author contributions**

52  
53 All authors contributed to the study concept and design. YHL led the writing of the  
54 manuscript and is the primary designer of the protocol. YHL, XYL collected the data for  
55  
56  
57  
58  
59  
60

1  
2  
3 screening. YHL, XYL, JL, KB, TB, and AP revised protocol critically. All authors read and  
4 approve revised version and final supported versions.  
5

### 6 **Ethics and dissemination**

7  
8 The present study will be published in a peer-reviewed journal when completed. If  
9 appropriate, we will present novelty findings at a relevant conference.  
10  
11

### 12 **REFERENCES**

- 13  
14  
15  
16 1. Ulrichsen SP, Mor A, Svensson E, et al. Lifestyle factors associated with type 2  
17 diabetes and use of different glucose-lowering drugs: cross-sectional study. *PloS one*.  
18 2014;9(11):e111849.  
19  
20 2. Zheng Y, Ley SH, Hu FB. Global aetiology and epidemiology of type 2 diabetes  
21 mellitus and its complications. *Nature reviews Endocrinology*. 2018;14(2):88-98.  
22  
23 3. World Health Organization. Global Report On Diabetes. 2016.  
24 [http://apps.who.int/iris/bitstream/handle/10665/204871/9789241565257\\_eng.pdf;jsessionid=](http://apps.who.int/iris/bitstream/handle/10665/204871/9789241565257_eng.pdf;jsessionid=3A98F9FAFB39CEDD335134750C4AB95B?sequence=1)  
25 [3A98F9FAFB39CEDD335134750C4AB95B?sequence=1](http://apps.who.int/iris/bitstream/handle/10665/204871/9789241565257_eng.pdf;jsessionid=3A98F9FAFB39CEDD335134750C4AB95B?sequence=1) (accessed 17 July 2017)  
26  
27 4. World Health Organization. *Diabetes-Fact sheet*.  
28 2016. [www.who.int/mediacentre/factsheets/fs312/en/](http://www.who.int/mediacentre/factsheets/fs312/en/) (accessed 17 July 2017).  
29  
30 5. American Diabetes Association. Data and statistics about diabetes. 2017.  
31 <http://www.diabetes.org/diabetes-basics/statistics/> (accessed 17 July 2017).  
32  
33 6. Diabetes cases could double in developing countries in next 30 years. *Saudi medical*  
34 *journal*. 2004;25(1):126.  
35  
36 7. Ferron M, Hinoi E, Karsenty G, et al. Osteocalcin differentially regulates beta cell and  
37 adipocyte gene expression and affects the development of metabolic diseases in wild-type  
38 mice. *Proceedings of the National Academy of Sciences of the United States of America*.  
39 2008;105(13):5266-70.  
40  
41 8. Lee NK, Sowa H, Hinoi E, et al. Endocrine regulation of energy metabolism by the  
42 skeleton. *Cell*. 2007;130(3):456-69.  
43  
44 9. Wei J, Karsenty G. An overview of the metabolic functions of osteocalcin. *Reviews in*  
45 *endocrine & metabolic disorders*. 2015;16(2):93-8.  
46  
47 10. O'Connor EM, Durack E. Osteocalcin: The extra-skeletal role of a vitamin K-  
48 dependent protein in glucose metabolism. *Journal of Nutrition & Intermediary Metabolism*.  
49 2017;7:8-13.  
50  
51  
52  
53  
54  
55  
56  
57  
58  
59  
60



11. Liang Y, Tan A, Liang D, et al. Low osteocalcin level is a risk factor for impaired glucose metabolism in a Chinese male population. *Journal of diabetes investigation*. 2016;7(4):522-8.
12. Shu H, Pei Y, Chen K, et al. Significant inverse association between serum osteocalcin and incident type 2 diabetes in a middle-aged cohort. *Diabetes/metabolism research and reviews*. 2016;32(8):867-74.
13. Raska I, Jr., Raskova M, Zikan V, et al. Prevalence and risk factors of osteoporosis in postmenopausal women with type 2 diabetes mellitus. *Central European journal of public health*. 2017;25(1):3-10.
14. Tonks KT, White CP, Center JR, et al. Bone turnover is suppressed in insulin resistance, independent of adiposity. *The Journal of clinical endocrinology and metabolism*. 2017;102(4):1112-21.
15. Zwakenberg SR, Gundberg CM, Spijkerman AM, et al. Osteocalcin is not associated with the risk of type 2 diabetes: findings from the EPIC-NL study. *PloS one*. 2015;10(9):e0138693.
16. Hwang YC, Jee JH, Jeong IK, et al. Circulating osteocalcin level is not associated with incident type 2 diabetes in middle-aged male subjects: mean 8.4-year retrospective follow-up study. *Diabetes care*. 2012;35(9):1919-24.
17. Brennan-Speranza TC, Conigrave AD. Osteocalcin: an osteoblast-derived polypeptide hormone that modulates whole body energy metabolism. *Calcified tissue international*. 2015;96(1):1-10.
18. Fernandes TAP, Goncalves LML, Brito JAA. Relationships between bone turnover and energy metabolism. *Journal of diabetes research*. 2017;2017:9021314.
19. Karsenty G. Update on the biology of osteocalcin. *Endocrine practice : official journal of the American College of Endocrinology and the American Association of Clinical Endocrinologists*. 2017;23(10):1270-4.
20. Mizokami A, Kawakubo-Yasukochi T, Hirata M. Osteocalcin and its endocrine functions. *Biochemical pharmacology*. 2017;132:1-8.
21. Starup-Linde J, Eriksen SA, Lykkeboe S, et al. Biochemical markers of bone turnover in diabetes patients--a meta-analysis, and a methodological study on the effects of glucose on bone markers. *Osteoporosis international : a journal established as result of cooperation between the European Foundation for Osteoporosis and the National Osteoporosis Foundation of the USA*. 2014;25(6):1697-708.



- 1
- 2
- 3 22. Liu C, Wo J, Zhao Q, et al. Association between Serum Total Osteocalcin Level and
- 4 Type 2 Diabetes Mellitus: A Systematic Review and Meta-Analysis. *Hormone and metabolic*
- 5 *research*. 2015;47(11):813-9.
- 6
- 7 23. Kunutsor SK, Apekey TA, Laukkanen JA. Association of serum total osteocalcin with
- 8 type 2 diabetes and intermediate metabolic phenotypes: systematic review and meta-analysis
- 9 of observational evidence. *European journal of epidemiology*. 2015;30(8):599-614.
- 10
- 11 24. Hygum K, Starup-Linde J, Harslof T, et al. Mechanisms in endocrinology: Diabetes
- 12 mellitus, a state of low bone turnover - a systematic review and meta-analysis. *European*
- 13 *journal of endocrinology*. 2017;176(3):R137-r57.
- 14
- 15 25. Moher D, Shamseer L, Clarke M et al. Preferred Reporting Items for Systematic
- 16 Review and Meta-Analysis Protocols (PRISMA-P) 2015 statement. *Syst Rev*. 2015;4(1):1.
- 17
- 18 26. Stroup DF, Berlin JA, Morton SC, et al. Meta-analysis of observational studies in
- 19 epidemiology: a proposal for reporting. Meta-analysis Of Observational Studies in
- 20 Epidemiology (MOOSE) group. *Jama*. 2000;283(15):2008-12.
- 21
- 22 27. Hozo SP, Djulbegovic B, Hozo I. Estimating the mean and variance from the median,
- 23 range, and the size of a sample. *BMC Medical Research Methodology*. 2005;5(1):13.
- 24
- 25 28. Wan X, Wang W, Liu J, et al. Estimating the sample mean and standard deviation
- 26 from the sample size, median, range and/or interquartile range. *BMC Medical Research*
- 27 *Methodology*. 2014;14(1):135.
- 28
- 29 29. Higgins JP, White IR, Anzuers-Cabrera J. Meta-analysis of skewed data: combining
- 30 results reported on log-transformed or raw scales. *Statistics in medicine*. 2008;27(29):6072-
- 31 92.
- 32
- 33 30. Egger M, Smith GD, Schneider M, et al. Bias in meta-analysis detected by a simple,
- 34 graphical test. *BMJ (Clinical research ed)*. 1997;315(7109):629-34.
- 35
- 36 31. Higgins JP, Thompson SG, Deeks JJ, et al. Measuring inconsistency in meta-analyses.
- 37 *BMJ (Clinical research ed)*. 2003;327(7414):557-60.
- 38
- 39 32. Wolfgang Viechtbauer. Conducting meta-analyses in R with the metafor package.
- 40 *Journal of Statistical Software*. 2010;36(3):1-48.
- 41
- 42 33. Begg CB, Mazumdar M. Operating characteristics of a rank correlation test for
- 43 publication bias. *Biometrics*. 1994;50(4):1088-101.
- 44
- 45 34. Bae JM. A suggestion for quality assessment in systematic reviews of observational
- 46 studies in nutritional epidemiology. *Epidemiol Health*. 2016;38(0): e2016014-0
- 47
- 48
- 49
- 50
- 51
- 52
- 53
- 54
- 55
- 56
- 57
- 58
- 59
- 60

1  
2  
3  
4  
5  
6  
7  
8  
9  
10  
11  
12  
13  
14  
15  
16  
17  
18  
19  
20  
21  
22  
23  
24  
25  
26  
27  
28  
29  
30  
31  
32  
33  
34  
35  
36  
37  
38  
39  
40  
41  
42  
43  
44  
45  
46  
47  
48  
49  
50  
51  
52  
53  
54  
55  
56  
57  
58  
59  
60

For peer review only

1  
2  
3  
4  
5  
6  
7  
8  
9  
10  
11  
12  
13  
14  
15  
16  
17  
18  
19  
20  
21  
22  
23  
24  
25  
26  
27  
28  
29  
30  
31  
32  
33  
34  
35  
36  
37  
38  
39  
40  
41  
42  
43  
44  
45  
46  
47  
48  
49  
50  
51  
52  
53  
54  
55  
56  
57  
58  
59  
60

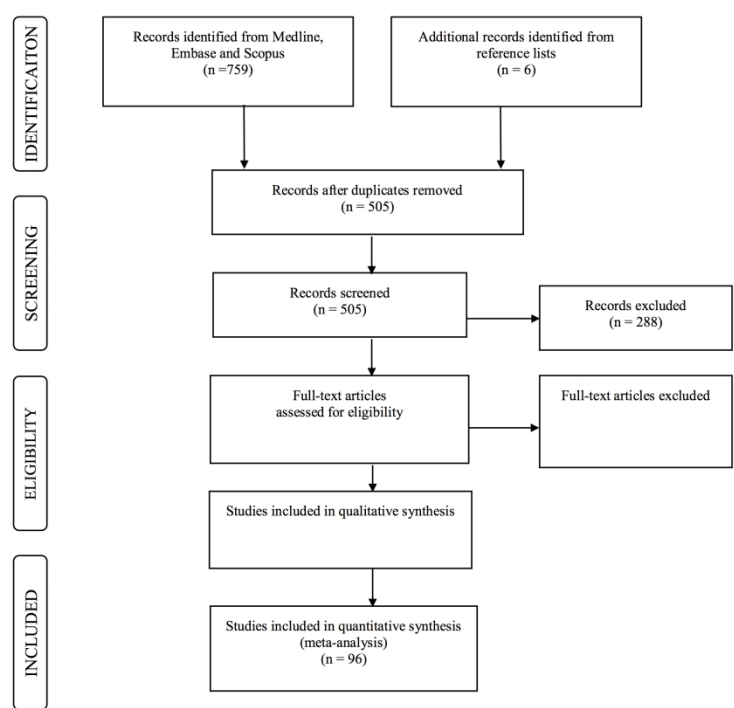

Figure 1. Process of proposed protocol (25).

The process of the proposed protocol.

209x297mm (300 x 300 DPI)

## Appendix 1. PRISMA-checklist

|                                   |                      | Reporting Item                                                                                                                                                                                                                | Page Number         |
|-----------------------------------|----------------------|-------------------------------------------------------------------------------------------------------------------------------------------------------------------------------------------------------------------------------|---------------------|
| 1                                 | 2                    | 3                                                                                                                                                                                                                             | 4                   |
| 5                                 | 6                    | 7                                                                                                                                                                                                                             | 8                   |
| 9                                 | 10                   | 11                                                                                                                                                                                                                            | 12                  |
| 13                                | 14                   | 15                                                                                                                                                                                                                            | 16                  |
| 17                                | 18                   | 19                                                                                                                                                                                                                            | 20                  |
| 21                                | 22                   | 23                                                                                                                                                                                                                            | 24                  |
| 25                                | 26                   | 27                                                                                                                                                                                                                            | 28                  |
| 29                                | 30                   | 31                                                                                                                                                                                                                            | 32                  |
| 33                                | 34                   | 35                                                                                                                                                                                                                            | 36                  |
| 37                                | 38                   | 39                                                                                                                                                                                                                            | 40                  |
| 41                                | 42                   | 43                                                                                                                                                                                                                            | 44                  |
| 45                                | 46                   | 47                                                                                                                                                                                                                            | 48                  |
| 49                                | 50                   | 51                                                                                                                                                                                                                            | 52                  |
| 53                                | 54                   | 55                                                                                                                                                                                                                            | 56                  |
| 57                                | 58                   | 59                                                                                                                                                                                                                            | 60                  |
| Identification                    | <a href="#">#1a</a>  | Identify the report as a protocol of a systematic review                                                                                                                                                                      | Title page & Page 4 |
| Update                            | <a href="#">#1b</a>  | If the protocol is for an update of a previous systematic review, identify as such                                                                                                                                            | n/a                 |
|                                   | <a href="#">#2</a>   | If registered, provide the name of the registry (such as PROSPERO) and registration number                                                                                                                                    |                     |
| Contact                           | <a href="#">#3a</a>  | Provide name, institutional affiliation, e-mail address of all protocol authors; provide physical mailing address of corresponding author                                                                                     | Title page          |
| Contribution                      | <a href="#">#3b</a>  | Describe contributions of protocol authors and identify the guarantor of the review                                                                                                                                           | Page 12             |
|                                   | <a href="#">#4</a>   | If the protocol represents an amendment of a previously completed or published protocol, identify as such and list changes; otherwise, state plan for documenting important protocol amendments                               | n/a                 |
| Sources                           | <a href="#">#5a</a>  | Indicate sources of financial or other support for the review                                                                                                                                                                 | Page 12             |
| Sponsor                           | <a href="#">#5b</a>  | Provide name for the review funder and / or sponsor                                                                                                                                                                           | n/a                 |
| Role of sponsor or funder         | <a href="#">#5c</a>  | Describe roles of funder(s), sponsor(s), and / or institution(s), if any, in developing the protocol                                                                                                                          | n/a                 |
| Rationale                         | <a href="#">#6</a>   | Describe the rationale for the review in the context of what is already known                                                                                                                                                 | Page 4              |
| Objectives                        | <a href="#">#7</a>   | Provide an explicit statement of the question(s) the review will address with reference to participants, interventions, comparators, and outcomes (PICO)                                                                      | Page 4              |
| Eligibility criteria              | <a href="#">#8</a>   | Specify the study characteristics (such as PICO, study design, setting, time frame) and report characteristics (such as years considered, language, publication status) to be used as criteria for eligibility for the review | Page 6              |
| Information sources               | <a href="#">#9</a>   | Describe all intended information sources (such as electronic databases, contact with study authors, trial registers or other grey literature sources) with planned dates of coverage                                         | Page 7              |
| Search strategy                   | <a href="#">#10</a>  | Present draft of search strategy to be used for at least one electronic database, including planned limits, such that it could be repeated                                                                                    | Page 7              |
| Study records - data management   | <a href="#">#11a</a> | Describe the mechanism(s) that will be used to manage records and data throughout the review                                                                                                                                  | Page 8              |
| Study records - selection process | <a href="#">#11b</a> | State the process that will be used for selecting studies (such as two independent reviewers) through each phase of the review (that is, screening, eligibility and inclusion in meta-analysis)                               | Page 8              |

|    |                    |                      |                                                          |
|----|--------------------|----------------------|----------------------------------------------------------|
| 1  |                    |                      |                                                          |
| 2  |                    |                      |                                                          |
| 3  | Study records -    | <a href="#">#11c</a> | Describe planned method of extracting data from          |
| 4  | data collection    |                      | reports (such as piloting forms, done independently,     |
| 5  | process            |                      | in duplicate), any processes for obtaining and           |
| 6  |                    |                      | confirming data from investigators                       |
| 7  |                    |                      |                                                          |
| 8  | Data items         | <a href="#">#12</a>  | List and define all variables for which data will be     |
| 9  |                    |                      | sought (such as PICO items, funding sources), any        |
| 10 |                    |                      | pre-planned data assumptions and simplifications         |
| 11 | Outcomes and       | <a href="#">#13</a>  | List and define all outcomes for which data will be      |
| 12 | prioritization     |                      | sought, including prioritization of main and             |
| 13 |                    |                      | additional outcomes, with rationale                      |
| 14 | Risk of bias in    | <a href="#">#14</a>  | Describe anticipated methods for assessing risk of       |
| 15 | individual studies |                      | bias of individual studies, including whether this       |
| 16 |                    |                      | will be done at the outcome or study level, or both;     |
| 17 |                    |                      | state how this information will be used in data          |
| 18 |                    |                      | synthesis                                                |
| 19 |                    |                      |                                                          |
| 20 | Data synthesis     | <a href="#">#15a</a> | Describe criteria under which study data will be         |
| 21 |                    |                      | quantitatively synthesised                               |
| 22 |                    | <a href="#">#15b</a> | If data are appropriate for quantitative synthesis,      |
| 23 |                    |                      | describe planned summary measures, methods of            |
| 24 |                    |                      | handling data and methods of combining data from         |
| 25 |                    |                      | studies, including any planned exploration of            |
| 26 |                    |                      | consistency (such as I <sup>2</sup> , Kendall's $\tau$ ) |
| 27 |                    | <a href="#">#15c</a> | Describe any proposed additional analyses (such as       |
| 28 |                    |                      | sensitivity or subgroup analyses, meta-regression)       |
| 29 |                    | <a href="#">#15d</a> | If quantitative synthesis is not appropriate, describe   |
| 30 |                    |                      | the type of summary planned                              |
| 31 |                    |                      |                                                          |
| 32 | Meta-bias(es)      | <a href="#">#16</a>  | Specify any planned assessment of meta-bias(es)          |
| 33 |                    |                      | (such as publication bias across studies, selective      |
| 34 |                    |                      | reporting within studies)                                |
| 35 |                    |                      |                                                          |
| 36 | Confidence in      | <a href="#">#17</a>  | Describe how the strength of the body of evidence        |
| 37 | cumulative         |                      | will be assessed (such as GRADE)                         |
| 38 | evidence           |                      |                                                          |

The PRISMA-P checklist is distributed under the terms of the Creative Commons Attribution License CC-BY 4.0. This checklist can be completed online using <https://www.goodreports.org/>, a tool made by the [EQUATOR Network](#) in collaboration with [Penelope.ai](#)

# BMJ Open

## THE ASSOCIATIONS BETWEEN SERUM OC/UCOC AND PATIENTS WITH TYPE II DIABETES: A SYSTEMATIC REVIEW / META-ANALYSIS STUDY PROTOCOL

|                                 |                                                                                                                                                                                                                                                                                                                                                                                                                                                                                                                                   |
|---------------------------------|-----------------------------------------------------------------------------------------------------------------------------------------------------------------------------------------------------------------------------------------------------------------------------------------------------------------------------------------------------------------------------------------------------------------------------------------------------------------------------------------------------------------------------------|
| Journal:                        | <i>BMJ Open</i>                                                                                                                                                                                                                                                                                                                                                                                                                                                                                                                   |
| Manuscript ID                   | bmjopen-2018-023918.R1                                                                                                                                                                                                                                                                                                                                                                                                                                                                                                            |
| Article Type:                   | Protocol                                                                                                                                                                                                                                                                                                                                                                                                                                                                                                                          |
| Date Submitted by the Author:   | 13-Aug-2018                                                                                                                                                                                                                                                                                                                                                                                                                                                                                                                       |
| Complete List of Authors:       | Liu, Yihui; Children's Hospital at Westmead, chronic kidney disease; The University of Sydney, Public Health<br>Liu, Xiaoying; The University of Sydney, Public Health<br>R. Lewis, Joshua; Children's Hospital at Westmead Centre for Kidney Research, Centre for Kidney Research<br>Brock, Kaye; University of Sydney, Physiology<br>C.Brennan-Speranza, Tara; The University of Sydney, Physiology<br>Teixeira-Pinto, Armando; The University of Sydney, Screening and Test Evaluation Program (STEP), School of Public Health |
| <b>Primary Subject Heading</b>: | Public health                                                                                                                                                                                                                                                                                                                                                                                                                                                                                                                     |
| Secondary Subject Heading:      | Diabetes and endocrinology, Public health                                                                                                                                                                                                                                                                                                                                                                                                                                                                                         |
| Keywords:                       | osteocalcin, type 2 diabetes, prediabetes, meta-analysis                                                                                                                                                                                                                                                                                                                                                                                                                                                                          |
|                                 |                                                                                                                                                                                                                                                                                                                                                                                                                                                                                                                                   |

SCHOLARONE™  
Manuscripts

1  
2  
3  
4 **THE ASSOCIATIONS BETWEEN SERUM OC/UCOC AND PATIENTS**  
5  
6 **WITH TYPE II DIABETES: A SYSTEMATIC REVIEW / META-**  
7  
8 **ANALYSIS STUDY PROTOCOL**  
9  
10

11  
12  
13  
14 **Yihui Liu<sup>1,2</sup>, Xiaoying Liu<sup>2</sup>, Joshua Lewis<sup>1,2,3,4</sup>, Kaye Brock<sup>5</sup>, Tara Brennan-Speranza<sup>2,5</sup>,**  
15 **Armando Teixeira-Pinto<sup>1,2\*</sup>**  
16  
17

18  
19  
20  
21  
22 **Affiliations:** <sup>1</sup>Centre for Kidney Research, The Children's Hospital at Westmead, Australia

23  
24 <sup>2</sup> School of Public Health, Faculty of Medicine, The University of Sydney, Australia.

25  
26 <sup>3</sup> Medical School, The University of Western Australia.

27  
28 <sup>4</sup> School of Medical and Health Sciences, Edith Cowan University, Joondalup, Australia.

29  
30 <sup>5</sup> Department of Physiology, Faculty of Medicine, The University of Sydney, Australia.  
31  
32

33  
34  
35  
36  
37 **Address correspondence to** Armando Teixeira-Pinto, Edward Ford Building (A27), Office  
38  
39 226A, The University of Sydney, NSW 2006, Australia, [armando.teixeira-](mailto:armando.teixeira-pinto@sydney.edu.au)  
40 [pinto@sydney.edu.au](mailto:armando.teixeira-pinto@sydney.edu.au), +61 2 9351 5424.  
41  
42  
43  
44  
45  
46  
47  
48  
49

50 **Word count:** 3624  
51  
52  
53  
54  
55  
56  
57  
58  
59  
60

## ABSTRACT

### Introduction

The global burden of type 2 diabetes (T2DM) is steadily increasing. Experimental studies have demonstrated a novel bone-cell secreted hormone, osteocalcin(OC), can stimulate beta-cell proliferation and improve insulin sensitivity in mice. Observational studies in humans have investigated the relationship between osteocalcin (OC) and metabolic parameters and T2DM. Importantly, few studies report on the uncarboxylated form of OC (ucOC), which is the putative active form of OC suggested to affect glucose metabolism.

### Objectives

We will conduct a systematic review and meta-analysis to: 1) compare the serum OC and ucOC between T2DM and normal glucose tolerant controls (NGC); 2) to investigate the risk ratios between serum OC and ucOC and T2DM; 3) to determine the correlation coefficient between OC and ucOC and fasting insulin levels (FINS), homeostatic model assessment-insulin resistance (HOMA-IR), haemoglobin A1c (HbA1c) and fasting glucose levels (FPG); 4) to explore potential sources of between-study heterogeneity. A secondary objective is to compare the serum OC and ucOC between prediabetes (PD) and NGC, and between T2DM and PD.

### Methods and analysis

This study will report items in line with the guidelines outlined in PRISMA and MOOSE (25,26). We will include observational studies (cohort, case-control and cross-sectional studies) and intervention studies with baseline data. Three databases (MEDLINE, EMBASE, and SCOPUS) will be searched from 1946 until July 2018 without language restrictions. Two reviewers will independently screen the titles and abstracts and conduct a full-text assessment to identify eligible studies. Discrepancies will be resolved by consensus with a third reviewer. The risk of bias assessment would be conducted by two reviewers independently based on the Newcastle-Ottawa Scale (NOS). Potential sources of between-study heterogeneity will be tested by meta-regression/subgroup analyses. Contour-enhanced funnel plots and Egger's test will be used to identify potential publication bias.

### Registration number in PROSPERO

CRD42017073127



1  
2  
3 Keywords

4 osteocalcin, type 2 diabetes, prediabetes, meta-analysis  
5  
6  
7

8 **Strengths and limitations of this study**  
9

- 10 • This review will undertake a sensitive search strategy to include more eligible  
11 observational studies (cohort, case-control and cross-sectional studies) than previous  
12 meta-analyses.  
13  
14 • The review will assess and synthesise data on both forms of OC (TOC and ucOC),  
15 potentially being more relevant to the endocrine function in humans.  
16  
17 • The design of the review considers early to late stages of diabetes which will indicate  
18 whether the relationship between OC and impaired glucose metabolism is altered  
19 during progressively poorer glucose control.  
20  
21 • Sources of heterogeneity will be explored using meta-regression/subgroups analyses.  
22  
23 • The main limitation of the current study is only including observational studies  
24 (cohort, case-control and cross-sectional studies).  
25  
26  
27  
28  
29  
30  
31  
32  
33  
34  
35  
36  
37  
38  
39  
40  
41  
42  
43  
44  
45  
46  
47  
48  
49  
50  
51  
52  
53  
54  
55  
56  
57  
58  
59  
60

## INTRODUCTION

Type 2 diabetes (T2DM) results from the body becoming progressively more resistant to the effects of insulin. This is termed insulin resistance. With the influence of long-term progress, blood sugar exceeds the normal levels and patients are diagnosed with T2DM. The disease now ranks 9<sup>th</sup> in the world global health threats list (1). Currently, around 425 million people have diabetes, with 90% of these having T2DM (1). It is estimated that by 2045, this figure will have increased to 629 million people (1).

Patients with T2DM have increased levels of glucose parameters/insulin resistance indices (2). Accordingly, the methods for diagnosing diabetes are based on measuring fasting plasma glucose (FPG), haemoglobin A1c (HbA1c), fasting insulin levels (FINS) and the homeostatic model assessment-insulin resistance (HOMA-IR) (3). Patients with T2DM have increased risks of other complications such as heart attacks, strokes, diabetic retinopathy and renal disease (3). Interestingly, other diabetic complications include impaired bone remodelling and fracture risk (4,5). Although the bone mineral density (BMD) in T2DM is generally reported to be normal or slightly higher than healthy age-matched individuals, large numbers of studies have reported an increased risk of hip fractures in people with T2DM (6,7).

Osteocalcin (OC) is an osteoblast secreted protein that plays a role in the communication between the skeleton and glucose homeostasis. There are two forms of OC: uncarboxylated osteocalcin (ucOC) and carboxylated osteocalcin (cOC) (8). The cOC contributes to extracellular bone matrix while ucOC is likely the active form of OC in the circulation (9). Both cOC and ucOC are present in the circulation, and the amount of them is known as total osteocalcin (TOC) (9). TOC is considered a marker of bone turnover (10).

A potential endocrine function of OC was first suggested in 2007. Lee *et al.* and Ferron *et al.* reported OC mediated glucose homeostasis via stimulating beta-cell proliferation and adiponectin secretion in mice (11,12). The endocrine actions of OC involve increasing insulin synthesis and secretion by beta-cells and improved insulin sensitivity by promoting adiponectin secretion in adipocytes (11,12). The high-fat diet experimental study revealed that bone could become insulin resistant by inhibiting the activation of OC (13). However, reported associations between OC and T2DM in humans have yielded conflicting results. (14–17). Lerchbaum *et al.* reported high OC was associated with reduced risk of developing T2DM in a population-based study (OR:0.57;95%CI:[0.46,0.70]) (18). Achemlal *et al.* reported, in a cross-sectional study of patients with poorly controlled T2DM, serum levels of OC were significantly lower in T2DM compared with age-matched controls (19). While Bao

1  
2  
3 *et al.* observed increased serum levels of OC were associated with improved glucose control  
4 (20). Yeap *et al.* found both TOC and ucOC were associated with reduced risk of developing  
5 diabetes in a cohort of community-dwelling elderly men (OR:0.60; 95%CI:[0.50,0.72] for  
6 TOC, and OR:0.55; 95%CI:[0.47,0.64] for ucOC) (21). In contrast, a case-control study by  
7 Zwakenberg *et al.* with 1,635 participants indicated there was no association between  
8 TOC/ucOC and the risk of T2DM (OR:0.97; 95%CI:[0.69,1.36] for TOC, and OR:0.88;  
9 95%CI:[0.61,1.27] for ucOC) (22).

10  
11  
12  
13  
14 Two previously published systematic reviews/meta-analyses have reported decreased  
15 levels of serum TOC in people with T2DM compared to controls. However, these reviews  
16 only found a small number of the published studies and did not investigate ucOC (23–25).  
17 The mean differences in T2DM compared with normal glucose tolerance controls from the  
18 three reviews showed similar results (-3.31ng/ml [-4.04, -2.57] from Kunutsor *et al.*; -2.87  
19 ng/ml [-3.76,-1.98] from Liu C *et al.* , and -2.51 ng/ml [-3.01,-2.01] from Hygum *et al.*) (23–  
20 25). Both of the reviews by Kunutsor *et al.* and Liu C *et al.* only found a small number (n=4)  
21 of cohort studies (23,24).. Additionally, studies reporting the associations between ucOC and  
22 glucose homeostasis in T2DM have not been adequately meta-analysed (24).

23  
24  
25  
26  
27  
28  
29 Some observational studies have reported decreased OC concentrations in pre-diabetics  
30 (PD) compared to normal glucose tolerance controls, while Aoki *et al.* indicated an increase  
31 of OC concentration in the early stage of diabetes (26–28). Therefore, conducting meta-  
32 analyses comparing the OC levels between PD and normal glucose controls and comparing  
33 OC levels between T2DM and PD may contribute to the investigation between OC and  
34 glucose homeostasis in patients with diabetes. Another unsolved issue in the previously  
35 published meta-analyses are the high between-study heterogeneity. Previous reviews  
36 explored different sources of heterogeneity with modest success (23,24). Starup-Linde *et al.*  
37 conducted subgroup analysis according to sex, age and menopausal status in women, (29).  
38 Liu C *et al.* attempted to explain the heterogeneity by sex and OC assay methods (24).  
39 Kunutsor *et al.* conducted subgroup analyses according to study design and degree of  
40 confounders of risk estimates (23). Hygum *et al.* performed a meta-regression analysis to  
41 investigate the extent to which heterogeneity was explained by haemoglobin A1c(HbA1c)  
42 levels (25).

43  
44  
45  
46  
47  
48  
49  
50  
51 Therefore, the present systematic review/meta-analysis will use a more comprehensive search  
52 strategy to identify more prospective studies, thereby increasing statistical power. Secondly,  
53 we will search for studies reporting the association between ucOC and glucose metabolism.  
54  
55  
56  
57  
58  
59  
60

1  
2  
3 Thirdly, we will identify studies comparing the OC concentrations between PD and normal  
4 glucose controls, and between T2DM and PD. Lastly, by systematically exploring potential  
5 sources of heterogeneity we may explain previous conflicting findings.  
6  
7

## 8 **OBJECTIVES**

9  
10 The present systematic review and meta-analysis aims to: 1) compare the serum OC and  
11 ucOC between T2DM and normal glucose tolerant controls (NGC); 2) investigate the risk  
12 ratios between serum OC and ucOC and T2DM; 3) determine the correlation coefficient  
13 between OC and ucOC and fasting insulin levels (FINS), homeostatic model assessment-  
14 insulin resistance (HOMA-IR), haemoglobin A1c (HbA1c) and fasting glucose levels (FPG);  
15 4) explore potential sources of between-study heterogeneity. A secondary objective is to  
16 compare the serum OC and ucOC between prediabetes (PD) and NGC, and between T2DM  
17 and PD.  
18  
19  
20  
21  
22  
23  
24  
25

## 26 **METHODS & ANALYSIS**

27  
28 We designed this systematic review and meta-analysis in adherence to the guidelines of  
29 Preferred Reporting Items for Systematic review and Meta-analysis (PRISMA) and Meta-  
30 analysis of observational studies in epidemiology (MOOSE) (30,31).The process of the  
31 proposed protocol is shown in Figure.1, and PRISMA-checklist shows in Appendix 1.  
32  
33  
34  
35

### 36 **Protocol and registration**

37  
38 This protocol is registered and available on PROSPERO (CRD42017073127).  
39

### 40 **Patient and public involvement statement**

41  
42 There is no patient or public involved in this systematic review/meta-analysis.  
43  
44

### 45 **Eligibility criteria for studies included in the review**

#### 46 Inclusion and exclusion criteria

##### 47 *Participants*

48  
49 Participants should be adult humans (older than 18 years old), with T2DM at baseline  
50 or developed T2DM afterward; not have any conditions that can affect bone metabolism  
51 or with medications that affect bone metabolism; could be with anti-diabetic treatments.  
52  
53  
54

55 Exclude:  
56  
57  
58  
59  
60

- 1
- 2
- 3 1. Children or adolescents (younger than 18 years old), pregnant or lactating women
- 4 because of altered bone turnover markers levels.
- 5
- 6 2. Patients with a disease that either affects bone metabolism or glucose metabolism:
- 7
- 8 3. Patients with type 1 diabetes and/or gestational diabetes as they are
- 9 pathophysiologically different from patients with T2DM.
- 10
- 11 4. Patients with Cushing's disease or Cushing's syndrome as they have a disordered
- 12 metabolism.
- 13
- 14 5. Patients with hormonal disorders. For instance, growth-hormone deficiency or
- 15 excess.
- 16
- 17 6. Patients with hyperparathyroidism or hypoparathyroidism or other diseases that
- 18 affect thyroid function because of increased OC levels and changes in metabolism.
- 19
- 20 7. Patients with liver dysfunction (alanine transaminase > 3 times upper limit of
- 21 normal).
- 22
- 23 8. Patients with impaired kidney function as described below:
- 24
  - 25 • A chronic renal disease when glomerular filtration rate of impaired renal
  - 26 function patients is below  $30\text{ml/min} \cdot 1.73\text{ m}^2$  at stage four or five, or
  - 27
  - 28 • A chronic renal illness when serum creatinine over 2.07 mg/dL, or renal
  - 29 osteodystrophy, or kidney transplant as 21% to 50% of kidney transplant
  - 30 recipients may develop secondary hyperparathyroidism after kidney
  - 31 transplantation or when treated with dialysis or hemodialysis.
  - 32
  - 33
  - 34
- 35 9. Patients with Paget's disease as they have disordered bone metabolism.
- 36
- 37 10. Patients with osteomalacia as it is a severe bone disease and affects bone
- 38 metabolism.
- 39
- 40 11. Patients with cancer or tumours. For example, bone cancer metastases could
- 41 mediate bone turnover marker levels.
- 42
- 43 12. Patients with human immunodeficiency virus (HIV).
- 44
- 45 13. Patients with sepsis as they have disordered immune response caused by infections.
- 46
- 47 14. Patients with medications that affect bone metabolism:
- 48
  - 49 • Antiresorptive or anabolic therapy for osteoporosis and selective estrogen
  - 50 receptor modulators (such as bisphosphonates, alendronate, etidronate,
  - 51 raloxifene, denosumab and teriparatide).
  - 52
  - 53 • Estrogen replacement therapy.
  - 54
  - 55 • Glucocorticoids and thiazide diuretics.
  - 56
  - 57
  - 58
  - 59
  - 60

1  
2  
3 15. Patients treated with surgery that directly affected hormone or thyroid function  
4 (i.e., thyroidectomy, oophorectomy and hysterectomy).  
5

6 Note:

- 7  
8  
9 1) We include intervention studies that reported baseline data of OC and  
10 T2DM. Accordingly, we will eliminate observational studies with more  
11 than 20% of the cohort taking above non-eligible therapy.  
12  
13 2) We included T2DM with diabetic medications, but they will be assessed  
14 using subgroup analysis by the medication status. Anti-diabetic medications  
15 that affect OC/ucOC levels include insulin therapy, glucagon-like peptide-1  
16 (GLP-1) receptor analogist and thiazolidinediones.  
17  
18  
19  
20  
21  
22

### 23 *Study types*

24 Observational studies are eligible for inclusion: cohort studies (both prospective and  
25 retrospective cohort studies), case-control study and cross-sectional study. Reporting  
26 eligible exposure(s) and outcome(s).  
27

28 We will exclude reviews, commentaries, short survey, case reports, and letters.

29  
30 Interventional studies (including randomised control trials) will be used if they provide  
31 eligible cross-sectional data at baseline before intervention.  
32  
33

### 34 **Exposure(s)**

35  
36 OC levels are identified from enzyme-linked immunoassay (ELISA or EIA), Electro-  
37 chemiluminescence immunoassay (ECLIA), Immunoradiometric assay (IRMA),  
38 radioimmunoassay (RIA) and hydroxylapatite binding assay (HAP). The standard unit for  
39 OC is ng/ml; thus, other presented groups for OC (eg. nmol/l) will be converted to ng/ml.  
40  
41  
42  
43  
44

### 45 Measures of OC

- 46  
47 • Total serum osteocalcin levels (ng/ml).  
48  
49 • Undercarboxylated osteocalcin levels(ng/ml).  
50  
51 • OC categorized as low (reference) and high groups. Tertile, quartile, or quantile are  
52 the common categories used for classing different levels of TOC or ucOC.  
53  
54  
55  
56  
57  
58  
59

## Outcome(s)

### Measures of T2DM

- Diabetes status categorized as type 2 diabetes disease or normal controls (reference)
- As some studies may categorize diabetes states as insulin-dependent diabetes mellitus (IDDM) and non-insulin dependent diabetes mellitus (NIDDM), NIDDM will be used and presented as T2DM.

Exclude Type 1 diabetes and gestational diabetes as they are pathophysiological different compared with T2DM.

### Secondary outcome(s)

- IGT /IFG that is the pre-diabetic state and has a higher risk of developing T2DM
- HbA1c percentages categorized as type 2 diabetes, prediabetes and healthy controls (reference) by HbA1c rates over 6.5%, between 5.7% and 6.5% and below 5.7% respectively.
- Fasting plasma glucose levels categorized as diabetes, prediabetes and healthy controls (reference) by FPG levels over 126mg/dl, between 100 and 126 mg/dl, and below 100 mg/dl respectively.

## Study design

### Search strategies

A comprehensive literature search within MEDLINE, EMBASE and SCOPUS databases will be conducted to source all possible relevant studies for the present review. There is no language restriction, and non-English articles will be translated when possible and evaluated for eligibility. There is no time restriction. We may include conference proceedings and abstracts if necessary. We will further conduct reference list searches of each available paper. If duplicate publications of the same study are retrieved, the most relevant and up to date paper with more complete data will be included. The detailed search strategy shows in Table.1

Table 1. Detailed search strategy in databases: Medline, Embase and Scopus.

| Medline (Ovid SP) | Embase (Ovid SP) | Scopus |
|-------------------|------------------|--------|
|-------------------|------------------|--------|

|                                                                                                       |                                                      |                                                         |
|-------------------------------------------------------------------------------------------------------|------------------------------------------------------|---------------------------------------------------------|
| 1. exp osteocalcin                                                                                    | 1. exp osteocalcin                                   | ( KEY ( 'osteocalcin' )                                 |
| 2. osteocalcin.mp                                                                                     | 2. osteocalcin.mp                                    | OR KEY ( 'bone AND gla AND protein' )                   |
| 3. bone gla protein.mp                                                                                | 3.bone gla protein.mp                                | OR KEY ( 'bone AND turnover AND markers' ) )            |
| 4. vitamin k?dependent bone protein*.mp                                                               | 4.vitamin k?dependent bone protein*.mp               | AND ( KEY ( 'diabetes AND mellitus' )                   |
| 5. 1 and 2 and 3 and 4                                                                                | 5. 1 and 2 and 3 and 4                               | OR KEY ( 'hemoglobin AND a1c' )                         |
| 6. exp diabetes mellitus, Type 2/II                                                                   | 6. exp non insulin dependent diabetes mellitus       | OR KEY ( 'fasting AND plasma AND glucose' ) )           |
| 7.diabetes mellitus type 2/II.mp                                                                      | 7. exp diabetes mellitus 2/II                        | AND KEY ( 'human' ) AND ( LIMIT-TO ( DOCTYPE , "ar" ) ) |
| 8. (T2D* or NIDDM or "type 2" or "type II").tw                                                        | 8. (T2D* or NIDDM or "type 2" or "type II").tw       |                                                         |
| 9. (prediabet* or pre diabet*).tw                                                                     | 9. (prediabet* or pre diabet*).tw                    |                                                         |
| 9. (non insulin\$ depend\$ or nonsinulin\$depend\$ or non insulin?depend\$ or noninsulin?depend\$).tw | 10. hyperglyc?emi*.tw                                |                                                         |
| 10.exp Hyperglycemia                                                                                  | 11. 6 or 7 or 8 or 9 or 10                           |                                                         |
| 11. hyperglycemia.mp                                                                                  | 12. 5 and 11                                         |                                                         |
| 12. hypergly?emi*.tw                                                                                  | 13. limit 13 to (human and exclude medline journals) |                                                         |
| 13. exp Hemoglobin A/ or exp Hemoglobin A , Glycosylated                                              |                                                      |                                                         |
| 14. HbA1c.mp                                                                                          |                                                      |                                                         |
| 15. ("HbA(1c)" or HbA1c or "HbA 1c" or ((glycosylated or glycated) adj h?emoglobin)).tw               |                                                      |                                                         |
| 16. 6 or 7 or 8 or 9 or 10 or 11 or 12 or 13 or 14 or 15                                              |                                                      |                                                         |
| 17. 5 and 16                                                                                          |                                                      |                                                         |
| 18. limit 17 to humans                                                                                |                                                      |                                                         |

### Process for selecting studies

One author will set up the search strategy and store the search results to Endnote X7. The search strategy and recorded search results will then be checked by another investigator. Two or more independent investigators will go through the abstract screening (to remove duplicate records of the same report and to include eligible articles), and full-text assessment (to



1  
2  
3 acquire full-texts of available studies and to construct citation lists of eligible items). If a  
4 discrepancy arises, the disagreement will be shared with investigators by email or face-to-  
5 face meetings before reaching a final decision.  
6  
7

### 8 9 **Data extraction**

10 One author will extract data from studies that are eligible for full-text assessment.  
11 Obtained data will be examined for a second time by the same author to correct any mistakes.  
12  
13 All extracted data will be saved in an excel spreadsheet.  
14  
15

16 Eligible extracted items: author and publication year, study design, study base, sample  
17 size, sex and postmenopausal status in females, age, ethnicity, country, osteocalcin assay  
18 methods, obesity measurements (body mass index or waist circumference), diabetic duration,  
19 anti-diabetic medications status, vitamin K supplementation/anti-vitamin K drugs, vitamin D  
20 supplementation, TOC/ucOC levels in groups, any risk estimate between TOC/ucOC and  
21 T2DM, any association between TOC/ucOC and HbA1c and/or FPG in T2DM, any  
22 association between TOC/ucOC and prediabetes and/or impaired glucose tolerance/impaired  
23 fasting glucose, any association between TOC/ucOC and standard glucose controls, any  
24 association between TOC/ucOC and HOMA-IR or HOMA-beta in T2DM.  
25  
26  
27  
28  
29  
30  
31

### 32 **Risk of bias assessment**

33  
34 The methodological quality will be assessed by Newcastle-Ottawa Scale (NOS). Cohort  
35 and case-control studies can be assessed by three main parts in the NOS: selection,  
36 comparability and outcome/exposure (32). The maximum score is nine points (32). The  
37 higher the score indicates a better methodological quality of the individual study (32). Cross-  
38 sectional studies can be assessed by modified NOS (33). The maximum score is ten points for  
39 the modified NOS, representing the highest quality (33). The quality assessment template can  
40 be found in supplementary materials.  
41  
42  
43  
44  
45

### 46 **Statistical analysis and data synthesis**

47  
48 Mean differences (MDs) with 95% CI will be calculated between T2DM and NGC, between  
49 PD and NGT, and between T2DM and PD. Estimates of effect size will be expressed as  
50 Relative Risk (RR) with 95% confidence intervals (95% CI) in cohort studies and Odds Ratio  
51 (OR) with 95% CI in case-control and cross-sectional studies. OR is expressed as one  
52 increased standard deviation (SD) of OC to the risk of developing T2DM. Papers reporting  
53  
54  
55  
56  
57  
58  
59  
60

1  
2  
3 other forms of OR will be translated to per increased SD of OC if there is logistic regression  
4 model. Pearson correlation coefficient will be analysed by investigating the relationships  
5 between TOC or ucOC and fasting insulin levels (FINS). Studies that only have medians and  
6 ranges or interquartile ranges (IQRs) will be transformed to means and standard deviations  
7 (34,35). Furthermore, log-transformed data will be converted to raw statistics before  
8  
9  
10  
11  
12  
13  
14  
15  
16  
17  
18  
19  
20  
21  
22  
23  
24  
25  
26  
27  
28  
29  
30  
31  
32  
33  
34  
35  
36  
37  
38  
39  
40  
41  
42  
43  
44  
45  
46  
47  
48  
49  
50  
51  
52  
53  
54  
55  
56  
57  
58  
59  
60

other forms of OR will be translated to per increased SD of OC if there is logistic regression model. Pearson correlation coefficient will be analysed by investigating the relationships between TOC or ucOC and fasting insulin levels (FINS). Studies that only have medians and ranges or interquartile ranges (IQRs) will be transformed to means and standard deviations (34,35). Furthermore, log-transformed data will be converted to raw statistics before subjecting to analyses (36). We will assess publication bias of MD and risk estimates by visual inspection of the funnel plots if there are the minimum number of studies (37,38). Egger's test will be used to assess the publication bias when there are a large number of studies (37). We will examine heterogeneity employing the  $I^2$  statistic by study ID which quantifies inconsistency across studies to assess the impact of heterogeneity on the meta-analysis (39).  $I^2$  represents the degree of heterogeneity.  $I^2$  thresholds of 0%-40%, 30%-60%, 50%-90% and 75%-100% indicate possibilities of low, moderate, substantial and be considerable heterogeneity (39). All meta-analyses are conducted by Rstudio (Version 1.1.419-2009-2019 Rstudio, Inc.). Metafor package will be used to produce meta-regression analyses, meta-bias analyses and assessing heterogeneities (40). Each P value below 0.05 indicates statistically significant.

### Meta-regression/subgroup analysis

Meta-regression analysis and subgroup analysis will be applied to assess the sources of heterogeneity. Meta-regression will be used for continuous factors such as age, sample size and proportion of postmenopausal in women. We will use subgroup analyses to identify potential sources of clinical, methodological or statistical heterogeneity for categorical variables. We will also generate mix-effect models to see the influence of multiple factors on the effect size. Random-effects models will be used, and p-values of  $< 0.01$  will be considered statistically significant for subgroup analyses. Pre-planned subgroup analyses to explore statistical heterogeneity will include stratification by:

- Subgroups based on study design.
- Subgroups based on age.
- Subgroups based on sex. Additionally, a subset based on menopausal status will be conducted in females.
- Subgroups based on ethnicity or race.
- Subgroups based on diabetic status (normal, prediabetes, T2DM).
- Subgroups based on anti-diabetic medication status in T2DM.

- Subgroups based on obesity measurements (body mass index/waist circumference).
- Subgroups based on OC assay methods.
- Subgroups based on the fasting measures and spot measures.
- Subgroups based on vitamin K supplementation/anti-vitamin K drugs or vitamin D supplementation if data available.

### **Publication bias & Confidence in cumulative evidence**

Publication bias assessment is based on graphical test (funnel plots) and Egger & Begg tests (37,38). The asymmetry of funnel plot suggests a higher risk of publication bias and vice versa (37). Statistically, Egger's and Begg's test will be conducted respectively in Rstudio.

We will provide assurance of the quality of our results by applying the Grading of Recommendations Assessment Development and Evaluation (GRADE) tool. We also will present an evidence profile summary with GRADEpro software (<http://ims.cochrane.org/grade>). The quality checklist includes the following items: risk of bias assessment, consistency of results, directness of evidence and precision of the results.

### **DISCUSSION**

The current systematic review/meta-analysis is an update and improvement to the current literature in several ways. Firstly, we will provide more evidence compared to previous investigations in analysing the potential role/s OC plays in T2DM by increasing the number of eligible studies included in our up-to-date analysis. Secondly, we are investigating the sources of heterogeneity, explicitly by an increase in the number of factors such as age, sex, postmenopausal status in women, study design, ethnicity or regions, OC assays and medications on T2DM. This comprehensive analysis on heterogeneity may uncover the factor(s) responsible for the difference among already published studies. Thirdly, we are producing a report not only on total osteocalcin (TOC) levels but also on undercarboxylated osteocalcin (ucOC) levels. By including investigations on ucOC, it is possible we can determine the endocrine roles of both OC and ucOC in humans, if any. Additionally, investigating the relationship in a subgroup of patients with prediabetes will provide more details regarding the influence of OC (or ucOC) on glucose levels in a progressive T2DM status. The major limitation of this review is that we will only be including observational

1  
2  
3 studies as there is insufficient evidence from clinical trials, which will restrict study results in  
4 specific analyses. Despite this disadvantage, there are still a large number of studies that  
5 could be used to pool a quantitative analysis and provide evidence according to concerns with  
6 heterogeneity. Our review will contribute to public health and clinical research for further  
7 investigations regarding the gap in the current literature.  
8  
9  
10

### 11 12 13 **Conflicts of interests**

14 All authors declare that there is no conflict of interests in this study protocol.  
15

### 16 17 **Data statement**

18 Technical appendix, statistical code, and dataset available from the Figshare repository,  
19 DOI: [10.6084/m9.figshare.6199364].  
20  
21  
22

### 23 **Funding**

24 Armando Teixeira-Pinto is partially supported by the NHMRC Program Grant BeatCKD  
25 [APP1092957].  
26  
27  
28  
29

### 30 **Author contributions**

31 All authors contributed to the study concept and design. YHL led the writing of the  
32 manuscript and is the primary designer of the protocol under the guidance of AP. TBS, JL,  
33 KB and AP conceived the conceptual ideas presented in the manuscript. YHL, XYL collected  
34 the data for screening. YHL, XYL, JL, KB, TBS, and AP revised protocol critically. All  
35 authors read and approved revised version and final supported versions.  
36  
37  
38  
39

### 40 **Ethics and dissemination**

41 The present study will be published in a peer-reviewed journal when completed. If  
42 appropriate, we will present novelty findings at a relevant conference.  
43  
44  
45  
46  
47  
48  
49  
50  
51  
52  
53  
54  
55  
56  
57  
58  
59  
60

**REFERENCES**

1. International Diabetes Federation. IDF Diabetes ATLAS: Eighth edition 2017 [Internet]. 2017 [cited 2018 Aug 2]. Available from: <http://www.diabetesatlas.org/across-the-globe.html>
2. Diagnosis and Classification of Diabetes Mellitus. Diabetes Care [Internet]. 2014 Jan 1;37(Supplement 1):S81 LP-S90. Available from: [http://care.diabetesjournals.org/content/37/Supplement\\_1/S81.abstract](http://care.diabetesjournals.org/content/37/Supplement_1/S81.abstract)
3. World Health Organization. Global Report on Diabetes. Isbn [Internet]. 2016;978:88. Available from: [http://www.who.int/about/licensing/%5Cnhttp://apps.who.int/iris/bitstream/10665/204871/1/9789241565257\\_eng.pdf](http://www.who.int/about/licensing/%5Cnhttp://apps.who.int/iris/bitstream/10665/204871/1/9789241565257_eng.pdf)
4. Shanbhogue V V, Mitchell DM, Rosen CJ, Bouxsein ML. Type 2 diabetes and the skeleton: new insights into sweet bones. Lancet Diabetes Endocrinol [Internet]. 2016;4(2):159–73. Available from: <http://www.sciencedirect.com/science/article/pii/S2213858715002831>
5. Al-hariri M. Sweet Bones : The Pathogenesis of Bone Alteration in Diabetes. 2016;2016.
6. Brown SA, Sharpless JL. Osteoporosis: An Under-appreciated Complication of Diabetes. 2004;22(1):10–20.
7. Wallander M, Axelsson KF, Nilsson AG, Lundh D, Lorentzon M. Type 2 Diabetes and Risk of Hip Fractures and Non-Skeletal Fall Injuries in the Elderly: A Study From the Fractures and Fall Injuries in the Elderly Cohort (FRAILCO). J Bone Miner Res. 2017;32(3):449–60.
8. Price PA. Gla-containing proteins of bone. Connect Tissue Res. 1989;21(1–4):51–60.
9. Wei J, Karsenty G. An Overview of the Metabolic Functions of Osteocalcin. Curr Osteoporos Rep. 2015;13(3):180–5.
10. Brown JP, Albert C, Nassar BA, Adachi JD, Cole D, Davison KS, et al. Bone turnover markers in the management of postmenopausal osteoporosis. Clin Biochem [Internet]. 2009;42(10–11):929–42. Available from: <http://dx.doi.org/10.1016/j.clinbiochem.2009.04.001>
11. Lee NK, Sowa H, Hinoi E, Ferron M, Ahn JD, Confavreux C, et al. Endocrine Regulation of Energy Metabolism by the Skeleton. Cell. 2007;130(3):456–69.

12. Ferron M, Hinoi E, Karsenty G, Ducy P. Osteocalcin differentially regulates beta cell and adipocyte gene expression and affects the development of metabolic diseases in wild-type mice. *Proc Natl Acad Sci U S A*. 2008;105(13):5266–70.
13. Wei J, Ferron M, Clarke CJ, Hannun YA, Jiang H, Blaner WS, et al. Bone-specific insulin resistance disrupts whole-body glucose homeostasis via decreased osteocalcin activation. *J Clin Invest*. 2014;124(4):1–13.
14. Hinoi E, Gao N, Jung DY, Yadav V, Yoshizawa T, Myers MG, et al. The sympathetic tone mediates leptin's inhibition of insulin secretion by modulating osteocalcin bioactivity. *J Cell Biol*. 2008;183(7):1235–42.
15. Iki M, Tamaki J, Fujita Y, Kouda K, Yura A, Kadowaki E, et al. Serum undercarboxylated osteocalcin levels are inversely associated with glycemic status and insulin resistance in an elderly Japanese male population: Fujiwara-kyo Osteoporosis Risk in Men (FORMEN) Study. *Osteoporos Int*. 2012;23(2):761–70.
16. Levinger I, Zebaze R, Jerums G, Hare DL, Selig S, Seeman E. The effect of acute exercise on undercarboxylated osteocalcin in obese men. *Osteoporos Int*. 2011;22(5):1621–6.
17. Brennan-Speranza TC, Conigrave AD. Osteocalcin: an osteoblast-derived polypeptide hormone that modulates whole body energy metabolism. *Calcif Tissue Int*. 2015;96(1):1–10.
18. Lerchbaum E, Schwetz V, Nauck M, Völzke H, Wallaschofski H, Hannemann A. Lower bone turnover markers in metabolic syndrome and diabetes: The population-based Study of Health in Pomerania. *Nutr Metab Cardiovasc Dis* [Internet]. 2015;25(5):458–63. Available from: <http://dx.doi.org/10.1016/j.numecd.2015.02.002>
19. Achemlal L, Tellal S, Rkiouak F, Nouijai A, Bezza A, Derouiche EM, et al. Bone metabolism in male patients with type 2 diabetes. *Clin Rheumatol*. 2005;24(5):493–6.
20. Bao Y-Q, Zhou M, Zhou J, Lu W, Gao Y-C, Pan X-P, et al. Relationship between serum osteocalcin and glycaemic variability in Type 2 diabetes. *Clin Exp Pharmacol Physiol* [Internet]. 2011;38(1):50–4. Available from: <http://doi.wiley.com/10.1111/j.1440-1681.2010.05463.x>
21. Yeap BB, Alfonso H, Chubb SAP, Gauci R, Byrnes E, Beilby JP, et al. Higher serum undercarboxylated osteocalcin and other bone turnover markers are associated with reduced diabetes risk and lower estradiol concentrations in older men. *J Clin Endocrinol Metab*. 2015;100(1):63–71.
22. Zwakenberg SR, Gundberg CM, Spijkerman AMW, Van Der Daphne LA, Van Der

- 1  
2  
3 Schouw YT, Beulens JWJ. Osteocalcin is not associated with the risk of type 2  
4 diabetes: Findings from the EPIC-NL study. *PLoS One* [Internet]. 2015;10(9):1–10.  
5 Available from: <http://dx.doi.org/10.1371/journal.pone.0138693>  
6  
7  
8 23. Kunutsor SK, Apekey TA, Laukkanen JA. Association of serum total osteocalcin with  
9 type 2 diabetes and intermediate metabolic phenotypes: systematic review and meta-  
10 analysis of observational evidence. *Eur J Epidemiol*. 2015;30(8):599–614.  
11  
12 24. Liu C, Wo J, Zhao Q, Wang Y, Wang B, Zhao W. Association between Serum Total  
13 Osteocalcin Level and Type 2 Diabetes Mellitus: A Systematic Review and Meta-  
14 Analysis. *Horm Metab Res*. 2015;47(11):813–9.  
15  
16  
17 25. Hygum K, Starup-Linde J, Harsløf T, Vestergaard P, Langdahl BL. Diabetes mellitus,  
18 a state of low bone turnover—a systematic review and meta-analysis. *Eur J Endocrinol*.  
19 2017;176(3):R137–57.  
20  
21  
22 26. Iglesias P, Arrieta F, Piñera M, Botella-Carretero JI, Balsa JA, Zamarrón I, et al.  
23 Serum concentrations of osteocalcin, procollagen type 1 N-terminal propeptide and  
24 beta-CrossLaps in obese subjects with varying degrees of glucose tolerance. *Clin*  
25 *Endocrinol (Oxf)*. 2011;75(2):184–8.  
26  
27  
28 27. Aoki A, Muneyuki T, Yoshida M, Munakata H, Ishikawa S e., Sugawara H, et al.  
29 Circulating osteocalcin is increased in early-stage diabetes. *Diabetes Res Clin Pract*  
30 [Internet]. 2011;92(2):181–6. Available from:  
31 <http://dx.doi.org/10.1016/j.diabres.2011.01.009>  
32  
33  
34 28. Liang Y, Tan A, Liang D, Yang X, Liao M, Gao Y, et al. Low osteocalcin level is a  
35 risk factor for impaired glucose metabolism in a Chinese male population. *J Diabetes*  
36 *Investig*. 2016;7(4):522–8.  
37  
38  
39 29. Linde JS, Eriksen SA, Lykkeboe S, Handberg A VP. Biochemical markers of bone  
40 turnover in diabetes patients — a meta-analysis , and a methodological study on the  
41 effects of glucose on bone markers. *Osteoporos Int* [Internet]. 2014;25(6):1697–708.  
42 Available from: <http://www.forskningsdatabasen.dk/en/catalog/267319680>  
43  
44  
45 30. Moher D, Liberati A, Tetzlaff J, Altman DG, Group TP. Preferred Reporting Items for  
46 Systematic Reviews and Meta-Analyses: The PRISMA Statement. *PLOS Med*  
47 [Internet]. 2009 Jul 21;6(7):e1000097. Available from:  
48 <https://doi.org/10.1371/journal.pmed.1000097>  
49  
50  
51 31. Stroup DF, Berlin JA, Morton SC, Olkin I, Williamson GD, Rennie D, et al. Meta-  
52 analysis of Observational Studies in Epidemiology: A Proposal for Reporting. *Jama*  
53 [Internet]. 2000;283(15):2008–12. Available from:  
54  
55  
56  
57  
58  
59



- 1  
2  
3 <http://www.ncbi.nlm.nih.gov/pubmed/10789670><http://jama.jamanetwork.com/article.aspx?doi=10.1001/jama.283.15.2008>
- 4  
5  
6 32. Wells GA, Shea B, O'connell D, Petersen J, Welch V, Losos M TP. The Newcastle-  
7  
8  
9  
10  
11  
12  
13  
14  
15  
16  
17  
18  
19  
20  
21  
22  
23  
24  
25  
26  
27  
28  
29  
30  
31  
32  
33  
34  
35  
36  
37  
38  
39  
40  
41  
42  
43  
44  
45  
46  
47  
48  
49  
50  
51  
52  
53  
54  
55  
56  
57  
58  
59  
60
- Ottawa Scale (NOS) for assessing the quality of nonrandomized studies in meta-analyses. Department of Epidemiology and Community Medicine, University of Ottawa, Canada.
33. Modesti PA, Reboldi G, Cappuccio FP, Agyemang C, Remuzzi G, Rapi S, et al. Panethnic Differences in Blood Pressure in Europe: A Systematic Review and Meta-Analysis. *PLoS One* [Internet]. 2016 Jan 25;11(1):e0147601. Available from: <https://doi.org/10.1371/journal.pone.0147601>
34. Hozo SP, Djulbegovic B, Hozo I. Estimating the mean and variance from the median, range, and the size of a sample. *BMC Med Res Methodol*. 2005;5:1–10.
35. Wan X, Wang W, Liu J, Tong T. Estimating the sample mean and standard deviation from the sample size, median, range and/or interquartile range. *BMC Med Res Methodol*. 2014;14(1):1–13.
36. Higgins JPT, White IR, Anzures-cabrera J. Meta-analysis of skewed data : Combining results reported on log-transformed or raw scales. 2008;(March 2007):6072–92.
37. Egger M, Smith GD, Schneider M, Minder C. Bias in meta - analysis detected by a simple , graphical test. *Bmj*. 2015;14(September):1–16.
38. Begg CB, Mazumdar M. Operating Characteristics of a Rank Correlation Test for Publication Bias Author ( s ): Colin B . Begg and Madhuchhanda Mazumdar Published by : International Biometric Society Stable URL : <http://www.jstor.org/stable/2533446>. *Biometrics*. 1994;50(4):1088–101.
39. Higgins JPT, Thompson SG, Deeks JJ, Altman DG. Measuring inconsistency in meta-analyses. *BMJ Br Med J*. 2003;327(7414):557–60.
40. Marcon E, Héroult B. Conducting Meta-Analyses in R with the metafor Package. *J Stat Softw* [Internet]. 2015;67(8). Available from: <http://brieger.esalq.usp.br/CRAN/web/packages/metafor/vignettes/metafor.pdf>



1  
2  
3  
4  
5  
6  
7  
8  
9  
10  
11  
12  
13  
14  
15  
16  
17  
18  
19  
20  
21  
22  
23  
24  
25  
26  
27  
28  
29  
30  
31  
32  
33  
34  
35  
36  
37  
38  
39  
40  
41  
42  
43  
44  
45  
46  
47  
48  
49  
50  
51  
52  
53  
54  
55  
56  
57  
58  
59  
60



Figure 1. Process of proposed protocol (25).

The process of the proposed protocol.

209x297mm (300 x 300 DPI)

Appendix 1. Quality assessment template for cross-sectional study based on Newcastle-Ottawa-Scale (NOS)

| Study number | Author | Year | Selection Bias Assessment (Maximum 5 stars) |       |             |       |                 |       |                                             |       | Comparability (Maximum 2 stars)    |       | Outcome (Maximum 3 stars) |       |                  |       | Total score (Maximum 10 stars) |
|--------------|--------|------|---------------------------------------------|-------|-------------|-------|-----------------|-------|---------------------------------------------|-------|------------------------------------|-------|---------------------------|-------|------------------|-------|--------------------------------|
|              |        |      | Representativeness of the sample            |       | Sample size |       | Non-respondents |       | Ascertainment of the exposure (risk factor) |       | Confounding factors are controlled |       | Assessment of the outcome |       | Statistical Test |       |                                |
|              |        |      | selection                                   | score | selection   | score | selection       | score | selection                                   | score | selection                          | score | selection                 | score | selection        | score |                                |
|              |        |      |                                             |       |             |       |                 |       |                                             |       |                                    |       |                           |       |                  |       |                                |
|              |        |      |                                             |       |             |       |                 |       |                                             |       |                                    |       |                           |       |                  |       |                                |

1  
2  
3  
4  
5  
6  
7  
8  
9  
10  
11  
12  
13  
14  
15  
16  
17  
18  
19  
20  
21  
22  
23  
24  
25  
26  
27  
28  
29  
30  
31  
32  
33  
34  
35  
36  
37  
38  
39  
40  
41  
42  
43  
44  
45  
46  
47

Appendix 2. Quality assessment template for cohort study based on Newcastle-Ottawa-Scale (NOS)

| Study number | Author | Year | Selection Bias Assessment (Maximum 4 stars) |       |                                     |       |                           |       |                                                                          |       | Comparability (Maximum 2 stars)                                 |       | Outcome (Maximum 3 stars) |       |                                                 |       |                                  |       | Total score (Maximum 10 stars) |
|--------------|--------|------|---------------------------------------------|-------|-------------------------------------|-------|---------------------------|-------|--------------------------------------------------------------------------|-------|-----------------------------------------------------------------|-------|---------------------------|-------|-------------------------------------------------|-------|----------------------------------|-------|--------------------------------|
|              |        |      | Representativeness of the exposed cohort    |       | Selection of the non-exposed cohort |       | Ascertainment of exposure |       | Demonstration that outcome of interest was not present at start of study |       | Comparability of cohorts on the basis of the design or analysis |       | Assessment of the outcome |       | Was follow-up long enough for outcomes to occur |       | Adequacy of follow up of cohorts |       |                                |
|              |        |      | selection                                   | score | selection                           | score | selection                 | score | selection                                                                | score | selection                                                       | score | selection                 | score | selection                                       | score | selection                        | score |                                |
|              |        |      |                                             |       |                                     |       |                           |       |                                                                          |       |                                                                 |       |                           |       |                                                 |       |                                  |       |                                |
|              |        |      |                                             |       |                                     |       |                           |       |                                                                          |       |                                                                 |       |                           |       |                                                 |       |                                  |       |                                |

Appendix 3. Quality assessment template for case-control study based on Newcastle-Ottawa-Scale (NOS)

| Study number | Author | Year | Selection Bias Assessment (Maximum 4 stars) |       |                                 |       |                       |       |                        |       | Comparability (Maximum 2 stars)                                            |       | Outcome (Maximum 3 stars)  |       |                                                     |       |                   |       | Total score (Maximum 10 stars) |
|--------------|--------|------|---------------------------------------------|-------|---------------------------------|-------|-----------------------|-------|------------------------|-------|----------------------------------------------------------------------------|-------|----------------------------|-------|-----------------------------------------------------|-------|-------------------|-------|--------------------------------|
|              |        |      | Is the case definition adequate?            |       | Representativeness of the cases |       | Selection of controls |       | Definition of controls |       | Comparability of cases and controls on the basis of the design or analysis |       | Assessment of the exposure |       | Same method of ascertainment for cases and controls |       | Non-response rate |       |                                |
|              |        |      | selection                                   | score | selection                       | score | selection             | score | selection              | score | selection                                                                  | score | selection                  | score | selection                                           | score | selection         | score |                                |
|              |        |      |                                             |       |                                 |       |                       |       |                        |       |                                                                            |       |                            |       |                                                     |       |                   |       |                                |
|              |        |      |                                             |       |                                 |       |                       |       |                        |       |                                                                            |       |                            |       |                                                     |       |                   |       |                                |

1  
2  
3  
4  
5  
6  
7  
8  
9  
10  
11  
12  
13  
14  
15  
16  
17  
18  
19  
20  
21  
22  
23  
24  
25  
26  
27  
28  
29  
30  
31  
32  
33  
34  
35  
36  
37  
38  
39  
40  
41  
42  
43  
44  
45  
46  
47

## Appendix 1. PRISMA-checklist

|                                   |                      | Reporting Item                                                                                                                                                                                                                | Page Number         |
|-----------------------------------|----------------------|-------------------------------------------------------------------------------------------------------------------------------------------------------------------------------------------------------------------------------|---------------------|
| Identification                    | <a href="#">#1a</a>  | Identify the report as a protocol of a systematic review                                                                                                                                                                      | Title page & Page 4 |
| Update                            | <a href="#">#1b</a>  | If the protocol is for an update of a previous systematic review, identify as such                                                                                                                                            | n/a                 |
|                                   | <a href="#">#2</a>   | If registered, provide the name of the registry (such as PROSPERO) and registration number                                                                                                                                    |                     |
| Contact                           | <a href="#">#3a</a>  | Provide name, institutional affiliation, e-mail address of all protocol authors; provide physical mailing address of corresponding author                                                                                     | Title page          |
| Contribution                      | <a href="#">#3b</a>  | Describe contributions of protocol authors and identify the guarantor of the review                                                                                                                                           | Page 12             |
|                                   | <a href="#">#4</a>   | If the protocol represents an amendment of a previously completed or published protocol, identify as such and list changes; otherwise, state plan for documenting important protocol amendments                               | n/a                 |
| Sources                           | <a href="#">#5a</a>  | Indicate sources of financial or other support for the review                                                                                                                                                                 | Page 12             |
| Sponsor                           | <a href="#">#5b</a>  | Provide name for the review funder and / or sponsor                                                                                                                                                                           | n/a                 |
| Role of sponsor or funder         | <a href="#">#5c</a>  | Describe roles of funder(s), sponsor(s), and / or institution(s), if any, in developing the protocol                                                                                                                          | n/a                 |
| Rationale                         | <a href="#">#6</a>   | Describe the rationale for the review in the context of what is already known                                                                                                                                                 | Page 4              |
| Objectives                        | <a href="#">#7</a>   | Provide an explicit statement of the question(s) the review will address with reference to participants, interventions, comparators, and outcomes (PICO)                                                                      | Page 4              |
| Eligibility criteria              | <a href="#">#8</a>   | Specify the study characteristics (such as PICO, study design, setting, time frame) and report characteristics (such as years considered, language, publication status) to be used as criteria for eligibility for the review | Page 6              |
| Information sources               | <a href="#">#9</a>   | Describe all intended information sources (such as electronic databases, contact with study authors, trial registers or other grey literature sources) with planned dates of coverage                                         | Page 7              |
| Search strategy                   | <a href="#">#10</a>  | Present draft of search strategy to be used for at least one electronic database, including planned limits, such that it could be repeated                                                                                    | Page 7              |
| Study records - data management   | <a href="#">#11a</a> | Describe the mechanism(s) that will be used to manage records and data throughout the review                                                                                                                                  | Page 8              |
| Study records - selection process | <a href="#">#11b</a> | State the process that will be used for selecting studies (such as two independent reviewers) through each phase of the review (that is, screening, eligibility and inclusion in meta-analysis)                               | Page 8              |

|    |                    |                      |                                                          |
|----|--------------------|----------------------|----------------------------------------------------------|
| 1  |                    |                      |                                                          |
| 2  |                    |                      |                                                          |
| 3  | Study records -    | <a href="#">#11c</a> | Describe planned method of extracting data from          |
| 4  | data collection    |                      | reports (such as piloting forms, done independently,     |
| 5  | process            |                      | in duplicate), any processes for obtaining and           |
| 6  |                    |                      | confirming data from investigators                       |
| 7  | Data items         | <a href="#">#12</a>  | List and define all variables for which data will be     |
| 8  |                    |                      | sought (such as PICO items, funding sources), any        |
| 9  |                    |                      | pre-planned data assumptions and simplifications         |
| 10 | Outcomes and       | <a href="#">#13</a>  | List and define all outcomes for which data will be      |
| 11 | prioritization     |                      | sought, including prioritization of main and             |
| 12 |                    |                      | additional outcomes, with rationale                      |
| 13 | Risk of bias in    | <a href="#">#14</a>  | Describe anticipated methods for assessing risk of       |
| 14 | individual studies |                      | bias of individual studies, including whether this       |
| 15 |                    |                      | will be done at the outcome or study level, or both;     |
| 16 |                    |                      | state how this information will be used in data          |
| 17 |                    |                      | synthesis                                                |
| 18 | Data synthesis     | <a href="#">#15a</a> | Describe criteria under which study data will be         |
| 19 |                    |                      | quantitatively synthesised                               |
| 20 |                    | <a href="#">#15b</a> | If data are appropriate for quantitative synthesis,      |
| 21 |                    |                      | describe planned summary measures, methods of            |
| 22 |                    |                      | handling data and methods of combining data from         |
| 23 |                    |                      | studies, including any planned exploration of            |
| 24 |                    |                      | consistency (such as I <sup>2</sup> , Kendall's $\tau$ ) |
| 25 |                    | <a href="#">#15c</a> | Describe any proposed additional analyses (such as       |
| 26 |                    |                      | sensitivity or subgroup analyses, meta-regression)       |
| 27 |                    | <a href="#">#15d</a> | If quantitative synthesis is not appropriate, describe   |
| 28 |                    |                      | the type of summary planned                              |
| 29 | Meta-bias(es)      | <a href="#">#16</a>  | Specify any planned assessment of meta-bias(es)          |
| 30 |                    |                      | (such as publication bias across studies, selective      |
| 31 |                    |                      | reporting within studies)                                |
| 32 | Confidence in      | <a href="#">#17</a>  | Describe how the strength of the body of evidence        |
| 33 | cumulative         |                      | will be assessed (such as GRADE)                         |
| 34 | evidence           |                      |                                                          |

37 The PRISMA-P checklist is distributed under the terms of the Creative Commons Attribution  
 38 License CC-BY 4.0. This checklist can be completed online using  
 39 <https://www.goodreports.org/>, a tool made by the [EQUATOR Network](#) in collaboration with  
 40 [Penelope.ai](#)  
 41  
 42  
 43  
 44  
 45  
 46  
 47  
 48  
 49  
 50  
 51  
 52  
 53  
 54  
 55  
 56  
 57  
 58  
 59  
 60

# BMJ Open

## THE RELATIONSHIP BETWEEN SERUM OSTEOCALCIN/ UNDERCARBOXYLATED OSTEOCALCIN AND TYPE II DIABETES: A SYSTEMATIC REVIEW/ META-ANALYSIS STUDY PROTOCOL

|                                 |                                                                                                                                                                                                                                                                                                                                                                                                                                                                                                                                   |
|---------------------------------|-----------------------------------------------------------------------------------------------------------------------------------------------------------------------------------------------------------------------------------------------------------------------------------------------------------------------------------------------------------------------------------------------------------------------------------------------------------------------------------------------------------------------------------|
| Journal:                        | <i>BMJ Open</i>                                                                                                                                                                                                                                                                                                                                                                                                                                                                                                                   |
| Manuscript ID                   | bmjopen-2018-023918.R2                                                                                                                                                                                                                                                                                                                                                                                                                                                                                                            |
| Article Type:                   | Protocol                                                                                                                                                                                                                                                                                                                                                                                                                                                                                                                          |
| Date Submitted by the Author:   | 19-Jan-2019                                                                                                                                                                                                                                                                                                                                                                                                                                                                                                                       |
| Complete List of Authors:       | Liu, Yihui; Children's Hospital at Westmead, chronic kidney disease; The University of Sydney, Public Health<br>Liu, Xiaoying; The University of Sydney, Public Health<br>R. Lewis, Joshua; Children's Hospital at Westmead Centre for Kidney Research, Centre for Kidney Research<br>Brock, Kaye; University of Sydney, Physiology<br>C.Brennan-Speranza, Tara; The University of Sydney, Physiology<br>Teixeira-Pinto, Armando; The University of Sydney, Screening and Test Evaluation Program (STEP), School of Public Health |
| <b>Primary Subject Heading</b>: | Public health                                                                                                                                                                                                                                                                                                                                                                                                                                                                                                                     |
| Secondary Subject Heading:      | Diabetes and endocrinology, Public health                                                                                                                                                                                                                                                                                                                                                                                                                                                                                         |
| Keywords:                       | osteocalcin, type 2 diabetes, prediabetes, meta-analysis                                                                                                                                                                                                                                                                                                                                                                                                                                                                          |
|                                 |                                                                                                                                                                                                                                                                                                                                                                                                                                                                                                                                   |

SCHOLARONE™  
Manuscripts

1  
2  
3  
4  
5 **THE RELATIONSHIP BETWEEN SERUM**  
6 **OSTEOCALCIN/UNDERCARBOXYLATED OSTEOCALCIN AND**  
7 **TYPE II DIABETES: A SYSTEMATIC REVIEW/ META-ANALYSIS**  
8 **STUDY PROTOCOL**  
9  
10  
11  
12  
13  
14  
15

16 **Yihui Liu<sup>1,2</sup>, Xiaoying Liu<sup>2</sup>, Joshua R. Lewis<sup>1,2,3,4</sup>, Kaye Brock<sup>5</sup>, Tara C. Brennan-**  
17 **Speranza<sup>2,5</sup>, Armando Teixeira-Pinto<sup>1,2\*</sup>**  
18  
19  
20  
21  
22  
23

24 **Affiliations:** <sup>1</sup>Centre for Kidney Research, The Children's Hospital at Westmead, Australia  
25

26  
27 <sup>2</sup> Biostatistics, School of Public Health, Faculty of Medicine and Health, The University of  
28 Sydney, Australia  
29

30  
31 <sup>3</sup> School of Medicine, Faculty of Health and Medical Sciences, The University of Western  
32 Australia, Perth, Australia  
33

34  
35 <sup>4</sup> School of Medical and Health Sciences, Edith Cowan University, Joondalup, Australia  
36

37 <sup>5</sup> Department of Physiology, Faculty of Medicine and Health, The University of Sydney,  
38 Australia  
39  
40  
41  
42  
43  
44  
45

46 **Address correspondence to** Armando Teixeira-Pinto, Edward Ford Building (A27), Office  
47 226A, The University of Sydney, NSW 2006, Australia, [armando.teixeira-](mailto:armando.teixeira-pinto@sydney.edu.au)  
48 [pinto@sydney.edu.au](mailto:armando.teixeira-pinto@sydney.edu.au), +61 2 9351 5424  
49  
50  
51  
52  
53  
54

55 **Word count:** 3624  
56

57 **ABSTRACT**  
58  
59  
60



## Introduction

The global burden of type 2 diabetes (T2DM) is steadily increasing. Experimental studies have demonstrated that a novel hormone secreted by bone cells, osteocalcin (OC), can stimulate beta-cell proliferation and improve insulin sensitivity in mice. Observational studies in humans have investigated the relationship between OC and metabolic parameters and T2DM. Importantly, few studies have reported on the uncarboxylated form of OC (ucOC), which is the putative active form of OC suggested to affect glucose metabolism.

## Objectives

We will conduct a systematic review and meta-analysis to: 1) compare the serum OC and ucOC between T2DM and normal glucose-tolerant controls; 2) investigate the risk ratios between serum OC and ucOC and T2DM; 3) determine the correlation coefficient between OC and ucOC and fasting insulin levels, homeostatic model assessment-insulin resistance, haemoglobin A1c, and fasting glucose levels; and 4) explore potential sources of between-study heterogeneity. The secondary objective is to compare the serum OC and ucOC between prediabetes and normal glucose-tolerant controls and between T2DM and prediabetes.

## Methods and analysis

This study will report items in line with the guidelines outlined in PRISMA and MOOSE. We will include observational studies (cohort, case-control and cross-sectional studies) and intervention studies with baseline data. Three databases (MEDLINE, EMBASE, and SCOPUS) will be searched from inception until July 2018 without language restrictions. Two reviewers will independently screen the titles and abstracts and conduct a full-text assessment to identify eligible studies. Discrepancies will be resolved by consensus with a third reviewer. The risk of bias assessment will be conducted by two reviewers independently based on the Newcastle-Ottawa Scale. Potential sources of between-study heterogeneity will be tested using meta-regression/subgroup analyses. Contour-enhanced funnel plots and Egger's test will be used to identify potential publication bias.

## Ethics and dissemination

Formal ethical approval is not required. We will disseminate the results to a peer-reviewed publication and conference presentation.

**Registration number in PROSPERO**

CRD42017073127

**Keywords:** osteocalcin, type 2 diabetes, prediabetes, meta-analysis**Strengths and limitations of this study**

- This review will propose a sensitive search strategy to include more eligible observational studies (cohort, case-control and cross-sectional studies) than previous meta-analyses.
- The review will assess and synthesise data on both forms of OC (total OC and ucOC), potentially being more relevant to the endocrine function in humans.
- The design of the review considers the early to late stages of diabetes, which will indicate whether the relationship between OC and impaired glucose metabolism is altered during progressively poorer glucose control.
- Sources of heterogeneity will be explored using meta-regression/subgroup analyses.
- The main limitation of the current study is only including observational studies (cohort, case-control and cross-sectional studies).

## INTRODUCTION

The disease burden attributed to diabetes is high. Currently, around 425 million people have diabetes, with 90% of these having T2DM.[1] It is estimated that by 2045, this figure will have increased to 629 million people.[1] Patients with T2DM present increased levels of glucose than people with normal glycaemic metabolism. Also, those patients have increased risks of other complications such as heart attacks, strokes, diabetic retinopathy, and renal disease.[2]

Correspondingly, several organs become the targets to treat, prevent or predict diabetes, such as pancreatic beta cells, muscle, liver, adipose tissue, kidney, the gastrointestinal tract, or the brain.[3] Interestingly, a recent study has identified a new potential tissue to treat diabetes: the skeleton and bone. Increasing numbers of osteokines secreted by skeleton and bone exhibit regulatory function in glucose metabolism.[3]

Osteocalcin (OC) is an osteoblast-secreted protein that plays a role in the communication between the skeleton and glucose homeostasis. There are two forms of OC: uncarboxylated osteocalcin (ucOC) and carboxylated osteocalcin (cOC).[4] cOC contributes to the extracellular bone matrix, while ucOC is likely the active form of OC in the circulation.[5] Both cOC and ucOC are present in the circulation, and their combined amount is referred to as total osteocalcin (TOC).[5] TOC is considered a marker of bone turnover.[6]

A potential endocrine function of OC was first suggested in 2007. Lee *et al.* and Ferron *et al.* reported OC mediated glucose homeostasis via stimulating beta-cell proliferation and adiponectin secretion in mice.[7,8] The endocrine actions of OC involve increasing insulin synthesis and secretion by beta-cells and improved insulin sensitivity by promoting adiponectin secretion in adipocytes.[7,8] The high-fat diet experimental study revealed that bone could become insulin resistant by inhibiting the activation of OC.[9] However, reported associations between OC and T2DM in humans have yielded conflicting results.[10–13] Lerchbaum *et al.* reported that high OC level was associated with reduced risk of developing T2DM in a population-based study (odds ratio [OR], 0.57; 95% confidence interval [CI]: 0.46, 0.70).[14] In a cross-sectional study of patients with poorly controlled T2DM, Achemlal *et al.* reported that serum levels of OC were significantly lower in T2DM compared with age-matched controls,[15] while Bao *et al.* observed that increased serum levels of OC were associated with improved glucose control.[16] Yeap *et al.* found that both TOC and ucOC were associated with

1  
2  
3 reduced risk of diabetes in a cohort of community-dwelling elderly men (OR, 0.60; 95% CI:  
4 0.50, 0.72 for TOC, and OR, 0.55; 95% CI: 0.47, 0.64 for ucOC).[17] In contrast, a case-control  
5 study conducted by Zwakenberg *et al.* with 1,635 participants indicated a lack of association  
6 between TOC/ucOC and the risk of T2DM (OR, 0.97; 95% CI: 0.69, 1.36 for TOC, and OR,  
7 0.88; 95% CI: 0.61, 1.27 for ucOC).[18]  
8  
9

10  
11  
12  
13 Two previously published systematic reviews/meta-analyses reported decreased serum  
14 levels of TOC in people with T2DM compared to controls in 2015. However, these reviews  
15 only found a small number of published studies and did not investigate ucOC.[19–21] The  
16 mean differences in T2DM compared with normal glucose tolerance controls from the three  
17 reviews showed similar results (-3.31 ng/ml [-4.04, -2.57] from Kunutsor *et al.*; -2.87 ng/ml [-  
18 3.76, -1.98] from Liu C *et al.*, and -2.51 ng/ml [-3.01, -2.01] from Hygum *et al.*).[19–21] Both  
19 of the reviews by Kunutsor *et al.* and Liu C *et al.* only found a small number (n=4) of cohort  
20 studies.[19,20] Additionally, studies reporting the associations between ucOC and glucose  
21 homeostasis in T2DM have not been adequately meta-analysed.[20]  
22  
23  
24  
25  
26  
27  
28  
29

30  
31 An increasing number of epidemiological studies have been continuously published in the  
32 recent three years following two systematic reviews/ meta-analyses in 2015, signalling a need  
33 for up-to-date systematic review/ meta-analysis. In 2017, Takashi *et al.* showed that ucOC  
34 could predict insulin secretion in patients with T2DM.[22] They conducted the study in 41  
35 Japanese patients with T2DM with a mean age of about 59 years [22] The result showed a  
36 correlation between ucOC and homeostatic model assessment of beta-cell function ( $r = 0.36$ ,  $p$   
37  $= 0.011$ ).[22] In a cross-sectional study of 69 volunteers, OC was found to be suppressed with  
38 insulin resistance, regardless of obesity or fat mass at significantly lower levels shown in  
39 controls compared with T2DM or insulin resistant obesity.[23] However, only a few  
40 interventional studies/ clinical trials were found in our scope search in MEDLINE (Appendix  
41 1). Only three clinical studies were conducted after 2015 and might be eligible for inclusion in  
42 the present review.[24–26] Ghiraldini *et al.* designed a clinical trial in 32 T2DM patients and  
43 19 patients without diabetes. Baseline data indicated that OC levels were higher in  
44 systematically healthy patients than those with better-controlled T2DM while poorly controlled  
45 T2DM patients had the highest OC levels.[26]  
46  
47  
48  
49  
50  
51  
52  
53  
54  
55  
56  
57

58 Some observational studies have reported decreased OC concentrations in pre-diabetics (PD)  
59 compared to normal glucose tolerance controls, while Aoki *et al.* indicated an increase in OC  
60

1  
2  
3 concentration during the early stage of diabetes.[27–29] Therefore, conducting meta-analyses  
4 comparing the OC levels between PD and normal glucose controls and comparing OC levels  
5 between T2DM and PD may contribute to the investigation between OC and glucose  
6 homeostasis in patients with diabetes.  
7  
8  
9

10  
11 Another unsolved issue in the previously published meta-analyses is the high between-study  
12 heterogeneity. Previous reviews explored different sources of heterogeneity with modest  
13 success.[19,20] Starup-Linde *et al.* conducted subgroup analysis according to sex, age and  
14 menopausal status in women.[30] Liu C *et al.* attempted to explain the heterogeneity by sex  
15 and OC assay methods.[20] Kunutsor *et al.* conducted subgroup analyses according to study  
16 design and degree of confounders of risk estimates.[19] Hygum *et al.* performed a meta-  
17 regression analysis to investigate the extent to which heterogeneity was explained by  
18 haemoglobin A1c (HbA1c) levels.[21]  
19  
20  
21  
22  
23  
24  
25  
26  
27

28 Therefore, the present systematic review/meta-analysis will use a more comprehensive  
29 search strategy to identify more prospective studies, thereby increasing the statistical power.  
30 Secondly, we will search for studies reporting the association between ucOC and glucose  
31 metabolism. Thirdly, we will identify studies comparing the OC concentrations between PD  
32 and normal glucose controls, and between T2DM and PD. Lastly, by systematically exploring  
33 potential sources of heterogeneity we may explain previous conflicting findings.  
34  
35  
36  
37  
38  
39  
40

## 41 **OBJECTIVES**

42  
43  
44

45 The present systematic review and meta-analysis aims to: 1) compare the serum OC and  
46 ucOC between T2DM and normal glucose-tolerant controls (NGC); 2) investigate the risk  
47 ratios between serum OC and ucOC, and T2DM; 3) determine the correlation coefficient  
48 between OC and ucOC, and fasting insulin levels, homeostatic model assessment-insulin  
49 resistance (HOMA-IR), HbA1c, and fasting glucose levels (FPG); and 4) explore potential  
50 sources of between-study heterogeneity. The secondary objective is to compare the serum OC  
51 and ucOC between PD and NGC, and between T2DM and PD.  
52  
53  
54  
55  
56  
57  
58  
59  
60

## METHODS AND ANALYSIS

We designed this systematic review and meta-analysis in adherence to the guidelines of Preferred Reporting Items for Systematic Reviews and Meta-analysis (PRISMA) and Meta-analysis of Observational Studies in Epidemiology (MOOSE).[31,32] The process of the proposed protocol is shown in Figure 1, and the PRISMA checklist shown in Appendix 2.

### Protocol and registration

This protocol is registered and available on PROSPERO (CRD42017073127).

### Patients and public involvement statement

There is no patient or public involved in this systematic review/meta-analysis.

### Eligibility criteria for studies included in the review

#### Inclusion and exclusion criteria

##### *Participants*

Participants should be adult humans (older than 18 years old), with T2DM at the baseline or developed T2DM afterwards; not have any conditions that can affect bone metabolism or with medications that affect bone metabolism; and could be on anti-diabetic treatment.

##### Exclude:

1. Children or adolescents (younger than 18 years), and pregnant or lactating women due to altered bone turnover marker levels.
2. Patients with a disease that either affects bone metabolism or glucose metabolism.
3. Patients with type 1 diabetes and/or gestational diabetes as they are pathophysiologically different from patients with T2DM.
4. Patients with Cushing's disease or Cushing's syndrome as they have disordered metabolism.
5. Patients with hormonal disorders. For instance, growth-hormone deficiency or excess.
6. Patients with hyperparathyroidism or hypoparathyroidism or other diseases that affect thyroid function due to increased OC levels and changes in metabolism.
7. Patients with liver dysfunction (alanine transaminase level > 3 times upper limit of normal).
8. Patients with impaired kidney function as described below:

- 1
  - 2
  - 3
  - 4
  - 5
  - 6
  - 7
  - 8
  - 9
  - 10
  - 11
  - 12
  - 13
  - 14
  - 15
  - 16
  - 17
  - 18
  - 19
  - 20
  - 21
  - 22
  - 23
  - 24
  - 25
  - 26
  - 27
  - 28
  - 29
  - 30
  - 31
  - 32
  - 33
  - 34
  - 35
  - 36
  - 37
  - 38
  - 39
  - 40
  - 41
  - 42
  - 43
  - 44
  - 45
  - 46
  - 47
  - 48
  - 49
  - 50
  - 51
  - 52
  - 53
  - 54
  - 55
  - 56
  - 57
  - 58
  - 59
  - 60
- Chronic renal disease patients with glomerular filtration rate below 30 ml/min·1.73 m<sup>2</sup> at stage four or five, or
  - Chronic renal disease patients with serum creatinine level over 2.07 mg/dL, or renal osteodystrophy, or kidney transplant as 21–50% of kidney transplant recipients may develop secondary hyperparathyroidism after kidney transplantation or when treated with dialysis or hemodialysis.
9. Patients with Paget's disease as they have disordered bone metabolism.
  10. Patients with osteomalacia as it is a severe bone disease and affects bone metabolism.
  11. Patients with cancer or tumours. For example, bone cancer metastases could affect bone turnover marker levels.
  12. Patients with human immunodeficiency virus infection.
  13. Patients with sepsis as they have disordered immune response caused by infections.
  14. Patients on medications that affect bone metabolism:
    - Antiresorptive or anabolic therapy for osteoporosis and selective oestrogen receptor modulators (such as bisphosphonates, alendronate, etidronate, raloxifene, denosumab and teriparatide).
    - Oestrogen replacement therapy.
    - Glucocorticoids and thiazide diuretics.
  15. Patients treated with surgery that directly affects hormone or thyroid function (i.e., thyroidectomy, oophorectomy and hysterectomy).

Note:

- 1) We include intervention studies that reported baseline data of OC and T2DM. Accordingly, we will eliminate observational studies with more than 20% of the cohort taking above non-eligible therapy.
- 2) We included T2DM with diabetic medications, but they will be assessed using subgroup analysis by medication status. Anti-diabetic medications that affect OC/ucOC levels include insulin therapy, glucagon-like peptide-1 (GLP-1) receptor agonists, and thiazolidinediones.



### *Study types*

Observational studies are eligible for inclusion: cohort studies (both prospective and retrospective cohort studies), case-control studies and cross-sectional studies, reporting eligible exposure(s) and outcome(s).

We will exclude reviews, commentaries, short surveys, case reports, and letters.

Interventional studies (including randomised controlled trials) will be used if they provide eligible cross-sectional data at the baseline before intervention.

### **Exposure(s)**

OC levels are identified from enzyme-linked immunosorbent assay, electrochemiluminescence immunoassay, immunoradiometric assay, radioimmunoassay and hydroxylapatite binding assay. The standard unit for OC is ng/ml; thus, other presented groups for OC (e.g. nmol/l) will be converted to ng/ml.

#### Measures of OC

- Total serum OC levels (ng/ml).
- ucOC levels (ng/ml).
- OC categorised as low (reference) and high groups. Tertile, quartile, or quantile are the common categories used for classifying different levels of TOC or ucOC.

### **Outcome(s)**

#### Measures of T2DM

- Diabetes status categorised as type 2 diabetes disease or normal controls (reference)
- As some studies may categorise diabetes states as insulin-dependent diabetes mellitus and non-insulin dependent diabetes mellitus (NIDDM), NIDDM will be used and presented as T2DM.

Exclude type 1 diabetes and gestational diabetes as they are pathophysiologically different compared with T2DM.

### **Secondary outcome(s)**

- Impaired glucose tolerance/impaired fasting glucose: that is the pre-diabetic state with a higher risk of developing T2DM.



- HbA1c levels categorised as type 2 diabetes, prediabetes and healthy controls (reference) by HbA1c rates over 6.5%, between 5.7% and 6.5%, and below 5.7%, respectively.
- Fasting plasma glucose levels categorised as diabetes, prediabetes and healthy controls (reference) by FPG levels over 126 mg/dl, between 100 and 126 mg/dl, and below 100 mg/dl, respectively.

## Study design

### Search strategies

A comprehensive literature search within MEDLINE, EMBASE and SCOPUS databases will be conducted to source all possible relevant studies for the present review. There is no language restriction, and non-English articles will be translated when possible and evaluated for eligibility. There is no time restriction. We may include conference proceedings and abstracts if necessary. We will further conduct reference list searches of each available paper. If duplicate publications of the same study are retrieved, the most relevant and up to date paper with more complete data will be included. The detailed search strategy is shown in Table 1.

Table 1. Detailed search strategy in databases: MEDLINE, EMBASE and SCOPUS

| MEDLINE (Ovid SP)                                                                                   | EMBASE (Ovid SP)                                     | SCOPUS                                                  |
|-----------------------------------------------------------------------------------------------------|------------------------------------------------------|---------------------------------------------------------|
| 1. exp osteocalcin                                                                                  | 1. exp osteocalcin                                   | ( KEY ( 'osteocalcin' )                                 |
| 2. osteocalcin.mp                                                                                   | 2. osteocalcin.mp                                    | OR KEY ( 'bone AND gla AND protein' )                   |
| 3. bone gla protein.mp                                                                              | 3. bone gla protein.mp                               | OR KEY ( 'bone AND turnover AND markers' ) )            |
| 4. vitamin k?dependent bone protein*.mp                                                             | 4. vitamin k?dependent bone protein*.mp              | AND ( KEY ( 'diabetes AND mellitus' )                   |
| 5. 1 or 2 or 3 or 4                                                                                 | 5. 1 and 2 and 3 and 4                               | OR KEY ( 'hemoglobin AND a1c' )                         |
| 6. exp diabetes mellitus, Type 2/II                                                                 | 6. exp non insulin dependent diabetes mellitus       | OR KEY ( 'fasting AND plasma AND glucose' ) )           |
| 7. diabetes mellitus type 2/II.mp                                                                   | 7. exp diabetes mellitus 2/II                        | AND KEY ( 'human' ) AND ( LIMIT-TO ( DOCTYPE , "ar" ) ) |
| 8. (T2D* or NIDDM or "type 2" or "type II").tw                                                      | 8. (T2D* or NIDDM or "type 2" or "type II").tw       |                                                         |
| 9. (non insulin\$ depend\$ or nonsulin\$depend\$ or non insulin?depend\$ or noninsulin?depend\$).tw | 9. (prediabet* or pre diabet*).tw                    |                                                         |
| 10. exp Hyperglycemia                                                                               | 10. hyperglyc?emi*.tw                                |                                                         |
| 11. hyperglycemia.mp                                                                                | 11. 6 or 7 or 8 or 9 or 10                           |                                                         |
| 12. hypergly?emi*.tw                                                                                | 12. 5 and 11                                         |                                                         |
| 13. exp Hemoglobin A/ or exp Hemoglobin A, Glycosylated                                             | 13. limit 13 to (human and exclude medline journals) |                                                         |
| 14. HbA1c.mp                                                                                        |                                                      |                                                         |
| 15. ("HbA(1c)" or HbA1c or "HbA 1c" or (glycosylated or glycated) adj h?emoglobin).tw               |                                                      |                                                         |
| 16. 6 or 7 or 8 or 9 or 10 or 11 or 12 or 13 or 14 or 15                                            |                                                      |                                                         |
| 17. 5 and 16                                                                                        |                                                      |                                                         |
| 18. limit 17 to humans                                                                              |                                                      |                                                         |

### Process for selecting studies

One author will set up the search strategy and store the search results in Endnote X7. The search strategy and recorded search results will then be checked by another investigator. Two or more independent investigators will perform the abstract screening (to remove duplicate records of the same report and to include eligible articles), and full-text assessment (to acquire full-texts of available studies and to construct citation lists of eligible items). If a discrepancy arises, the disagreement will be discussed with investigators by email or face-to-face meetings before reaching a final decision.

### Data extraction

Two authors will independently extract data from studies that are eligible for full-text assessment. If any discrepancy arises, a third reviewer will examine the data. All extracted data will be saved in an Excel spreadsheet.

Eligible extracted items: author and publication year, study design, study base, sample size, sex and postmenopausal status in females, age, ethnicity, country, OC assay methods, obesity measurements (body mass index or waist circumference), duration of diabetes, anti-diabetic medications status, vitamin K supplementation/anti-vitamin K drugs, vitamin D supplementation, TOC/ucOC levels in groups, any risk estimate between TOC/ucOC and T2DM, any association between TOC/ucOC and HbA1c and/or FPG in T2DM, any association between TOC/ucOC and prediabetes and/or impaired glucose tolerance/impaired fasting glucose, any association between TOC/ucOC and standard glucose controls, and any association between TOC/ucOC and HOMA-IR or HOMA-beta in T2DM.

### Risk of bias assessment

The methodological quality will be assessed using the Newcastle-Ottawa Scale (NOS). Cohort and case-control studies can be assessed by three main parts in the NOS: selection, comparability and outcome/exposure.[33] The maximum score is nine points.[33] A higher score indicates better methodological quality of the individual study.[33] Cross-sectional studies can be assessed using the modified NOS.[34] The maximum score is ten points for the modified NOS, representing the highest quality.[34] The quality assessment template can be found in the supplementary materials (Appendix 3).

### Statistical analysis and data synthesis

Mean differences with 95% CI will be calculated between T2DM and NGC, between PD and NGT, and between T2DM and PD. Estimates of effect size will be expressed as relative risk (RR) with 95% CI for cohort studies and OR with 95% CI for case-control and cross-sectional studies. OR is expressed as one increased standard deviation (SD) of OC to the risk of developing T2DM. Papers reporting other forms of OR will be translated to per increased SD of OC if a logistic regression model is used. Pearson's correlation coefficient will be analysed by investigating the relationships between TOC or ucOC and fasting insulin levels. Studies that only have medians and ranges or interquartile ranges will be transformed to means and standard deviations.[35,36] Furthermore, log-transformed data will be converted to raw statistics before subjecting to analyses.[37] We will assess publication bias of mean differences and risk estimates by visual inspection of the funnel plots[38,39] Egger's test will be used to assess the publication bias when there is a large number of studies.[38] We will evaluate heterogeneity employing the  $I^2$  statistic by study ID which quantifies inconsistency across studies to assess the impact of heterogeneity on the meta-analysis.[40]  $I^2$  represents the degree of heterogeneity.  $I^2$  thresholds of 0–40%, 30–60%, 50–90%, and 75–100% indicate possibilities of low, moderate, substantial, and considerable heterogeneity, respectively.[40] It is suggested to use Rstudio conducting meta-analyses RStudio (version 1.1.419-2009-2019; RStudio Inc.). The "metafor" package will be used to perform meta-regression analyses, meta-bias analyses and for assessing heterogeneities.[41] Each P value below 0.05 indicates statistical significance.

### Meta-regression/subgroup analysis

Meta-regression analysis and subgroup analysis will be applied to assess the sources of heterogeneity. Meta-regression will be used for continuous factors such as age, sample size and proportion of postmenopausal women. We will use subgroup analyses to identify potential sources of clinical, methodological or statistical heterogeneity for categorical variables. We will also generate mix-effect models to evaluate the influence of multiple factors on the effect size. Random-effects models will be used, and p-values of  $< 0.01$  will be considered statistically significant for subgroup analyses. Pre-planned subgroup analyses to explore statistical heterogeneity will include stratification by:

- Subgroups based on study design.
- Subgroups based on age.

- Subgroups based on sex. Additionally, a subset based on menopausal status will be assessed among females.
- Subgroups based on ethnicity or race.
- Subgroups based on diabetic status (normal, prediabetes, T2DM).
- Subgroups based on anti-diabetic medication status in T2DM.
- Subgroups based on obesity measurements (body mass index/waist circumference).
- Subgroups based on OC assay methods.
- Subgroups based on fasting measures and spot measures.
- Subgroups based on vitamin K supplementation/anti-vitamin K drugs or vitamin D supplementation if data are available.

### **Publication bias and confidence in cumulative evidence**

Publication bias assessment is based on graphical test (funnel plots) and Egger's and Begg's tests.[38,39] The asymmetry of the funnel plot suggests a higher risk of publication bias and vice versa.[38] Statistically, Egger's and Begg's tests will be conducted using RStudio.

We will provide assurance of the quality of our results by applying the Grading of Recommendations Assessment Development and Evaluation (GRADE) tool. We will also present an evidence profile summary using GRADEpro software (<http://ims.cochrane.org/grade>). The quality checklist includes the following items: risk of bias assessment, consistency of results, directness of evidence, and precision of the results.

### **DISCUSSION**

The current systematic review/meta-analysis constitutes an update and improvement to the current literature in several ways. Firstly, we will provide more evidence compared to previous investigations in analysing the potential role/s OC plays in T2DM by increasing the number of eligible studies included in our up-to-date analysis. Secondly, we will investigate the sources of heterogeneity, explicitly by an increase in the number of factors such as age, sex, postmenopausal status in women, study design, ethnicity or regions, OC assays, and medications on T2DM. This comprehensive analysis of heterogeneity may uncover the factor(s) responsible for the differences among already published studies. Thirdly, we will produce a report not only on TOC levels but also on ucOC levels. By including investigations on ucOC, we can determine the endocrine roles of both OC and ucOC in humans, if any.

1  
2  
3 Additionally, investigating the relationship in a subgroup of patients with prediabetes will  
4 provide more details regarding the influence of OC (or ucOC) on glucose levels in a progressive  
5 T2DM status. The major limitation of this review is that we will only be including  
6 observational studies as there is insufficient evidence from clinical trials, which will restrict  
7 study results in specific analyses. According to the search results for clinical studies, if there  
8 are any eligible interventional studies, we will include them but only use the baseline data in  
9 which case we will regard those studies as cross-sectional studies. Despite this disadvantage,  
10 there are still a large number of studies that could be used to pool a quantitative analysis and  
11 provide evidence according to concerns with heterogeneity. Our review will contribute to  
12 public health and clinical research for further investigations regarding the gap in the current  
13 literature.  
14  
15  
16  
17  
18  
19  
20  
21  
22  
23

#### 24 **Conflicts of interest**

25 None declared.  
26  
27  
28

#### 29 **Data statement**

30 Technical appendix, statistical code, and dataset available from the Figshare repository, DOI:  
31 [10.6084/m9.figshare.6199364].  
32  
33  
34

#### 35 **Funding**

36 Armando Teixeira-Pinto is partially supported by the NHMRC Program Grant BeatCKD  
37 [APP1092957].  
38  
39  
40  
41  
42

#### 43 **Author contributions**

44 All authors contributed to the study concept and design. YHL led the writing of the  
45 manuscript and is the primary designer of the protocol under the guidance of AP. TBS, JL, KB,  
46 and AP conceived the conceptual ideas presented in the manuscript. YHL, XYL collected the  
47 data for screening. YHL, XYL, JL, KB, TBS, and AP revised the protocol critically. All authors  
48 read and approved the revised version and final supported versions.  
49  
50  
51  
52

#### 53 **Ethics and dissemination**

54 The present study will be published in a peer-reviewed journal when completed. If  
55 appropriate, we will present novelty findings at a relevant conference.  
56  
57  
58  
59  
60

**REFERENCES**

1. International Diabetes Federation. IDF Diabetes ATLAS: Eighth edition 2017 [Internet]. 2017 [cited 2018 Aug 2]. Available from: <http://www.diabetesatlas.org/across-the-globe.html>
2. World Health Organization. Global Report on Diabetes. Isbn [Internet]. 2016;978:88. Available from: [http://www.who.int/about/licensing/%5Cnhttp://apps.who.int/iris/bitstream/10665/204871/1/9789241565257\\_eng.pdf](http://www.who.int/about/licensing/%5Cnhttp://apps.who.int/iris/bitstream/10665/204871/1/9789241565257_eng.pdf)
3. Liu D mei, Mosialou I, Liu J min. Bone: Another potential target to treat, prevent and predict diabetes. *Diabetes, Obes Metab*. 2018;20(8):1817–28.
4. Price PA. Gla-containing proteins of bone. *Connect Tissue Res*. 1989;21(1–4):51–60.
5. Wei J, Karsenty G. An Overview of the Metabolic Functions of Osteocalcin. *Curr Osteoporos Rep*. 2015;13(3):180–5.
6. Brown JP, Albert C, Nassar BA, Adachi JD, Cole D, Davison KS, et al. Bone turnover markers in the management of postmenopausal osteoporosis. *Clin Biochem* [Internet]. 2009;42(10–11):929–42. Available from: <http://dx.doi.org/10.1016/j.clinbiochem.2009.04.001>
7. Lee NK, Sowa H, Hinoi E, Ferron M, Ahn JD, Confavreux C, et al. Endocrine Regulation of Energy Metabolism by the Skeleton. *Cell*. 2007;130(3):456–69.
8. Ferron M, Hinoi E, Karsenty G, Ducy P. Osteocalcin differentially regulates beta cell and adipocyte gene expression and affects the development of metabolic diseases in wild-type mice. *Proc Natl Acad Sci U S A*. 2008;105(13):5266–70.
9. Wei J, Ferron M, Clarke CJ, Hannun YA, Jiang H, Blaner WS, et al. Bone-specific insulin resistance disrupts whole-body glucose homeostasis via decreased osteocalcin activation. *J Clin Invest*. 2014;124(4):1–13.
10. Hinoi E, Gao N, Jung DY, Yadav V, Yoshizawa T, Myers MG, et al. The sympathetic tone mediates leptin's inhibition of insulin secretion by modulating osteocalcin bioactivity. *J Cell Biol*. 2008;183(7):1235–42.
11. Iki M, Tamaki J, Fujita Y, Kouda K, Yura A, Kadowaki E, et al. Serum undercarboxylated osteocalcin levels are inversely associated with glycemic status and insulin resistance in an elderly Japanese male population: Fujiwara-kyo Osteoporosis Risk in Men (FORMEN) Study. *Osteoporos Int*. 2012;23(2):761–70.
12. Levinger I, Zebaze R, Jerums G, Hare DL, Selig S, Seeman E. The effect of acute



- exercise on undercarboxylated osteocalcin in obese men. *Osteoporos Int*. 2011;22(5):1621–6.
13. Brennan-Speranza TC, Conigrave AD. Osteocalcin: an osteoblast-derived polypeptide hormone that modulates whole body energy metabolism. *Calcif Tissue Int*. 2015;96(1):1–10.
14. Lerchbaum E, Schwetz V, Nauck M, Völzke H, Wallaschofski H, Hannemann A. Lower bone turnover markers in metabolic syndrome and diabetes: The population-based Study of Health in Pomerania. *Nutr Metab Cardiovasc Dis* [Internet]. 2015;25(5):458–63. Available from: <http://dx.doi.org/10.1016/j.numecd.2015.02.002>
15. Achemlal L, Tellal S, Rkiouak F, Nouijai A, Bezza A, Derouiche EM, et al. Bone metabolism in male patients with type 2 diabetes. *Clin Rheumatol*. 2005;24(5):493–6.
16. Bao Y-Q, Zhou M, Zhou J, Lu W, Gao Y-C, Pan X-P, et al. Relationship between serum osteocalcin and glycaemic variability in Type 2 diabetes. *Clin Exp Pharmacol Physiol* [Internet]. 2011;38(1):50–4. Available from: <http://doi.wiley.com/10.1111/j.1440-1681.2010.05463.x>
17. Yeap BB, Alfonso H, Paul Chubb SA, Gauci R, Byrnes E, Beilby JP, et al. Higher serum undercarboxylated osteocalcin and other bone turnover markers are associated with reduced diabetes risk and lower estradiol concentrations in older men. *J Clin Endocrinol Metab*. 2015;100(1):63–71.
18. Zwakenberg SR, Gundberg CM, Spijkerman AMW, Van Der Daphne LA, Van Der Schouw YT, Beulens JWJ. Osteocalcin is not associated with the risk of type 2 diabetes: Findings from the EPIC-NL study. *PLoS One* [Internet]. 2015;10(9):1–10. Available from: <http://dx.doi.org/10.1371/journal.pone.0138693>
19. Kunutsor SK, Apekey TA, Laukkanen JA. Association of serum total osteocalcin with type 2 diabetes and intermediate metabolic phenotypes: systematic review and meta-analysis of observational evidence. *Eur J Epidemiol*. 2015;30(8):599–614.
20. Liu C, Wo J, Zhao Q, Wang Y, Wang B, Zhao W. Association between Serum Total Osteocalcin Level and Type 2 Diabetes Mellitus: A Systematic Review and Meta-Analysis. *Horm Metab Res*. 2015;47(11):813–9.
21. Hygum K, Starup-Linde J, Harsløf T, Vestergaard P, Langdahl BL. Diabetes mellitus, a state of low bone turnover—a systematic review and meta-analysis. *Eur J Endocrinol*. 2017;176(3):R137–57.
22. Takashi Y, Koga M, Matsuzawa Y, Saito J, Omura M, Nishikawa T. Undercarboxylated osteocalcin can predict insulin secretion ability in type 2 diabetes. *J*



- 1  
2  
3  
4  
5  
6  
7  
8  
9  
10  
11  
12  
13  
14  
15  
16  
17  
18  
19  
20  
21  
22  
23  
24  
25  
26  
27  
28  
29  
30  
31  
32  
33  
34  
35  
36  
37  
38  
39  
40  
41  
42  
43  
44  
45  
46  
47  
48  
49  
50  
51  
52  
53  
54  
55  
56  
57  
58  
59  
60
- Diabetes Investig. 2017;8(4):471–4.
23. Tonks KT, White CP, Center JR, Samocha-Bonet D, Greenfield JR. Bone turnover is suppressed in insulin resistance, independent of adiposity. *J Clin Endocrinol Metab*. 2017;102(4):1112–21.
24. Liu C, Jiang D. High glucose-induced LIF suppresses osteoblast differentiation via regulating STAT3/SOCS3 signaling. *Cytokine* [Internet]. 2017;91:132–9. Available from: <http://dx.doi.org/10.1016/j.cyto.2016.12.016>
25. Lasco A, Morabito N, Basile G, Atteritano M, Gaudio A, Giorgianni GM, et al. Denosumab Inhibition of RANKL and Insulin Resistance in Postmenopausal Women with Osteoporosis. *Calcif Tissue Int* [Internet]. 2016;98(2):123–8. Available from: <http://ovidsp.ovid.com/ovidweb.cgi?T=JS&PAGE=reference&D=med8&NEWS=N&AN=26498169>
26. Ghiraldini B, Conte A, Casarin RC, Casati MZ, Pimentel SP, Cirano FR, et al. Influence of Glycemic Control on Peri-Implant Bone Healing: 12-Month Outcomes of Local Release of Bone-Related Factors and Implant Stabilization in Type 2 Diabetics. *Clin Implant Dent Relat Res* [Internet]. 2016;18(4):801–9. Available from: <http://ovidsp.ovid.com/ovidweb.cgi?T=JS&PAGE=reference&D=med8&NEWS=N&AN=25825337>
27. Iglesias P, Arrieta F, Piñera M, Botella-Carretero JI, Balsa JA, Zamarrón I, et al. Serum concentrations of osteocalcin, procollagen type 1 N-terminal propeptide and beta-CrossLaps in obese subjects with varying degrees of glucose tolerance. *Clin Endocrinol (Oxf)*. 2011;75(2):184–8.
28. Aoki A, Muneyuki T, Yoshida M, Munakata H, Ishikawa S e., Sugawara H, et al. Circulating osteocalcin is increased in early-stage diabetes. *Diabetes Res Clin Pract* [Internet]. 2011;92(2):181–6. Available from: <http://dx.doi.org/10.1016/j.diabres.2011.01.009>
29. Liang Y, Tan A, Liang D, Yang X, Liao M, Gao Y, et al. Low osteocalcin level is a risk factor for impaired glucose metabolism in a Chinese male population. *J Diabetes Investig*. 2016;7(4):522–8.
30. Linde JS, Eriksen SA, Lykkeboe S, Handberg A VP. Biochemical markers of bone turnover in diabetes patients — a meta-analysis , and a methodological study on the effects of glucose on bone markers. *Osteoporos Int* [Internet]. 2014;25(6):1697–708. Available from: <http://www.forskningsdatabasen.dk/en/catalog/267319680>
31. Moher D, Liberati A, Tetzlaff J, Altman DG, Group TP. Preferred Reporting Items for

- 1  
2  
3 Systematic Reviews and Meta-Analyses: The PRISMA Statement. PLOS Med  
4 [Internet]. 2009 Jul 21;6(7):e1000097. Available from:  
5  
6 <https://doi.org/10.1371/journal.pmed.1000097>  
7
- 8 32. Stroup DF, Berlin JA, Morton SC, Olkin I, Williamson GD, Rennie D, et al. Meta-  
9 analysis of Observational Studies in Epidemiology: A Proposal for Reporting. *Jama*  
10 [Internet]. 2000;283(15):2008–12. Available from:  
11 <http://www.ncbi.nlm.nih.gov/pubmed/10789670>  
12 [http://jama.jamanetwork.com/ar](http://jama.jamanetwork.com/article.aspx?doi=10.1001/jama.283.15.2008)  
13 [ticle.aspx?doi=10.1001/jama.283.15.2008](http://jama.jamanetwork.com/article.aspx?doi=10.1001/jama.283.15.2008)  
14  
15  
16
- 17 33. Wells GA, Shea B, O'connell D, Petersen J, Welch V, Losos M TP. The Newcastle-  
18 Ottawa Scale (NOS) for assessing the quality of nonrandomized studies in meta-  
19 analyses. Department of Epidemiology and Community Medicine, University of  
20 Ottawa, Canada.  
21  
22  
23
- 24 34. Modesti PA, Reboldi G, Cappuccio FP, Agyemang C, Remuzzi G, Rapi S, et al.  
25 Panethnic Differences in Blood Pressure in Europe: A Systematic Review and Meta-  
26 Analysis. *PLoS One* [Internet]. 2016 Jan 25;11(1):e0147601. Available from:  
27 <https://doi.org/10.1371/journal.pone.0147601>  
28  
29  
30
- 31 35. Hozo SP, Djulbegovic B, Hozo I. Estimating the mean and variance from the median,  
32 range, and the size of a sample. *BMC Med Res Methodol*. 2005;5:1–10.  
33
- 34 36. Wan X, Wang W, Liu J, Tong T. Estimating the sample mean and standard deviation  
35 from the sample size, median, range and/or interquartile range. *BMC Med Res*  
36 *Methodol*. 2014;14(1):1–13.  
37  
38
- 39 37. Higgins JPT, White IR, Anzuers-cabrera J. Meta-analysis of skewed data : Combining  
40 results reported on log-transformed or raw scales. 2008;(March 2007):6072–92.  
41  
42
- 43 38. Egger M, Smith GD, Schneider M, Minder C. Bias in meta - analysis detected by a  
44 simple , graphical test. *Bmj*. 2015;14(September):1–16.  
45
- 46 39. Begg CB, Mazumdar M. Operating Characteristics of a Rank Correlation Test for  
47 Publication Bias Author ( s ): Colin B . Begg and Madhuchhanda Mazumdar Published  
48 by : International Biometric Society Stable URL : <http://www.jstor.org/stable/2533446>.  
49 *Biometrics*. 1994;50(4):1088–101.  
50  
51  
52
- 53 40. Higgins JPT, Thompson SG, Deeks JJ, Altman DG. Measuring inconsistency in meta-  
54 analyses. *BMJ Br Med J*. 2003;327(7414):557–60.  
55
- 56 41. Marcon E, Héroult B. Conducting Meta-Analyses in R with the metafor Package. *J*  
57 *Stat Softw* [Internet]. 2015;67(8). Available from:  
58 <http://brieger.esalq.usp.br/CRAN/web/packages/metafor/vignettes/metafor.pdf>  
59  
60

1  
2  
3  
4  
5  
6  
7  
8  
9  
10  
11  
12  
13  
14  
15  
16  
17  
18  
19  
20  
21  
22  
23  
24  
25  
26  
27  
28  
29  
30  
31  
32  
33  
34  
35  
36  
37  
38  
39  
40  
41  
42  
43  
44  
45  
46  
47  
48  
49  
50  
51  
52  
53  
54  
55  
56  
57  
58  
59  
60

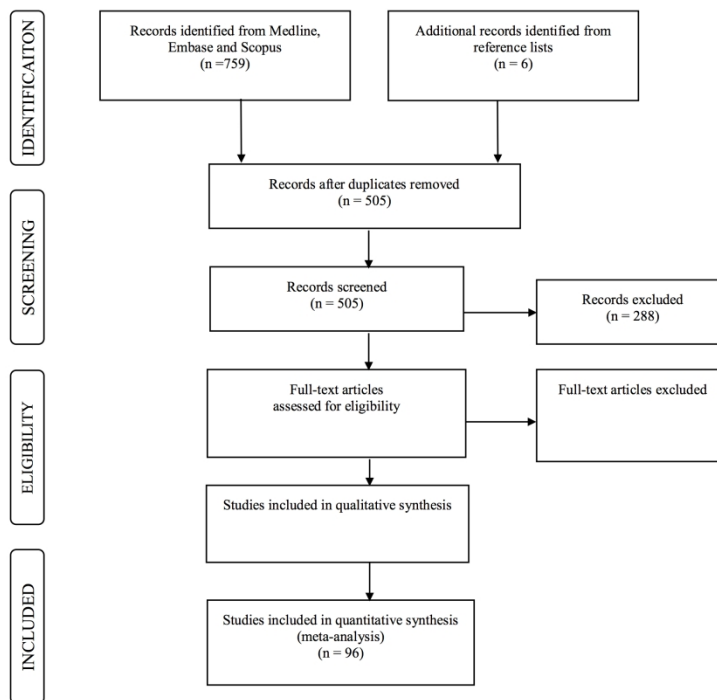

Figure 1. Process of proposed protocol (25).

The process of the proposed protocol.

209x297mm (300 x 300 DPI)

## Appendix 1.

The scope search strategy to identify the trial study being published after 2015.

| ▼ Search History (19)    |     |                                                                                      |                 |
|--------------------------|-----|--------------------------------------------------------------------------------------|-----------------|
| <input type="checkbox"/> | # ▲ | Searches                                                                             | Results Type    |
| <input type="checkbox"/> | 1   | exp osteocalcin/                                                                     | 9689 Advanced   |
| <input type="checkbox"/> | 2   | osteocalcin.mp.                                                                      | 16198 Advanced  |
| <input type="checkbox"/> | 3   | bone gla protein.mp.                                                                 | 631 Advanced    |
| <input type="checkbox"/> | 4   | 1 or 2 or 3                                                                          | 16354 Advanced  |
| <input type="checkbox"/> | 5   | exp diabetes mellitus, Type 2/                                                       | 119103 Advanced |
| <input type="checkbox"/> | 6   | diabetes mellitus type 2.mp.                                                         | 119425 Advanced |
| <input type="checkbox"/> | 7   | (T2D* or NIDDM or "type 2" or "type II").tw.                                         | 229963 Advanced |
| <input type="checkbox"/> | 8   | (noninsulin\$ depend\$ or non insulin?depend\$ or noninsulin?depend\$).tw.           | 1409 Advanced   |
| <input type="checkbox"/> | 9   | exp hyperglycemia/                                                                   | 33658 Advanced  |
| <input type="checkbox"/> | 10  | hyperglycemia.mp.                                                                    | 47853 Advanced  |
| <input type="checkbox"/> | 11  | hypergly?emi*.tw.                                                                    | 39454 Advanced  |
| <input type="checkbox"/> | 12  | exp Hemoglobin A/ or exp Hemoglobin A, Glycosylated/                                 | 35398 Advanced  |
| <input type="checkbox"/> | 13  | HbA1c.mp.                                                                            | 22933 Advanced  |
| <input type="checkbox"/> | 14  | ("HbA(1c)" or HbA1c or "HbA 1c" or ((glycosylated or glycated) adj h?emoglobin)).tw. | 35894 Advanced  |
| <input type="checkbox"/> | 15  | 5 or 6 or 7 or 8 or 9 or 10 or 11 or 12 or 13 or 14                                  | 332918 Advanced |
| <input type="checkbox"/> | 16  | 4 and 15                                                                             | 662 Advanced    |
| <input type="checkbox"/> | 17  | limit 16 to humans                                                                   | 453 Advanced    |
| <input type="checkbox"/> | 18  | limit 17 to yr="2015 -Current"                                                       | 125 Advanced    |
| <input type="checkbox"/> | 19  | limit 18 to (clinical study or randomized controlled trial)                          | 6 Advanced      |

## Appendix 2. PRISMA-checklist

|                                   |                      | Reporting Item                                                                                                                                                                                                                | Page Number         |
|-----------------------------------|----------------------|-------------------------------------------------------------------------------------------------------------------------------------------------------------------------------------------------------------------------------|---------------------|
| 1                                 | 2                    | 3                                                                                                                                                                                                                             | 4                   |
| 5                                 | 6                    | 7                                                                                                                                                                                                                             | 8                   |
| 9                                 | 10                   | 11                                                                                                                                                                                                                            | 12                  |
| 13                                | 14                   | 15                                                                                                                                                                                                                            | 16                  |
| 17                                | 18                   | 19                                                                                                                                                                                                                            | 20                  |
| 21                                | 22                   | 23                                                                                                                                                                                                                            | 24                  |
| 25                                | 26                   | 27                                                                                                                                                                                                                            | 28                  |
| 29                                | 30                   | 31                                                                                                                                                                                                                            | 32                  |
| 33                                | 34                   | 35                                                                                                                                                                                                                            | 36                  |
| 37                                | 38                   | 39                                                                                                                                                                                                                            | 40                  |
| 41                                | 42                   | 43                                                                                                                                                                                                                            | 44                  |
| 45                                | 46                   | 47                                                                                                                                                                                                                            | 48                  |
| 49                                | 50                   | 51                                                                                                                                                                                                                            | 52                  |
| 53                                | 54                   | 55                                                                                                                                                                                                                            | 56                  |
| 57                                | 58                   | 59                                                                                                                                                                                                                            | 60                  |
| Identification                    | <a href="#">#1a</a>  | Identify the report as a protocol of a systematic review                                                                                                                                                                      | Title page & Page 4 |
| Update                            | <a href="#">#1b</a>  | If the protocol is for an update of a previous systematic review, identify as such                                                                                                                                            | n/a                 |
|                                   | <a href="#">#2</a>   | If registered, provide the name of the registry (such as PROSPERO) and registration number                                                                                                                                    |                     |
| Contact                           | <a href="#">#3a</a>  | Provide name, institutional affiliation, e-mail address of all protocol authors; provide physical mailing address of corresponding author                                                                                     | Title page          |
| Contribution                      | <a href="#">#3b</a>  | Describe contributions of protocol authors and identify the guarantor of the review                                                                                                                                           | Page 12             |
|                                   | <a href="#">#4</a>   | If the protocol represents an amendment of a previously completed or published protocol, identify as such and list changes; otherwise, state plan for documenting important protocol amendments                               | n/a                 |
| Sources                           | <a href="#">#5a</a>  | Indicate sources of financial or other support for the review                                                                                                                                                                 | Page 12             |
| Sponsor                           | <a href="#">#5b</a>  | Provide name for the review funder and / or sponsor                                                                                                                                                                           | n/a                 |
| Role of sponsor or funder         | <a href="#">#5c</a>  | Describe roles of funder(s), sponsor(s), and / or institution(s), if any, in developing the protocol                                                                                                                          | n/a                 |
| Rationale                         | <a href="#">#6</a>   | Describe the rationale for the review in the context of what is already known                                                                                                                                                 | Page 4              |
| Objectives                        | <a href="#">#7</a>   | Provide an explicit statement of the question(s) the review will address with reference to participants, interventions, comparators, and outcomes (PICO)                                                                      | Page 4              |
| Eligibility criteria              | <a href="#">#8</a>   | Specify the study characteristics (such as PICO, study design, setting, time frame) and report characteristics (such as years considered, language, publication status) to be used as criteria for eligibility for the review | Page 6              |
| Information sources               | <a href="#">#9</a>   | Describe all intended information sources (such as electronic databases, contact with study authors, trial registers or other grey literature sources) with planned dates of coverage                                         | Page 7              |
| Search strategy                   | <a href="#">#10</a>  | Present draft of search strategy to be used for at least one electronic database, including planned limits, such that it could be repeated                                                                                    | Page 7              |
| Study records - data management   | <a href="#">#11a</a> | Describe the mechanism(s) that will be used to manage records and data throughout the review                                                                                                                                  | Page 8              |
| Study records - selection process | <a href="#">#11b</a> | State the process that will be used for selecting studies (such as two independent reviewers) through each phase of the review (that is, screening, eligibility and inclusion in meta-analysis)                               | Page 8              |

|    |                    |                      |                                                          |
|----|--------------------|----------------------|----------------------------------------------------------|
| 1  |                    |                      |                                                          |
| 2  |                    |                      |                                                          |
| 3  | Study records -    | <a href="#">#11c</a> | Describe planned method of extracting data from          |
| 4  | data collection    |                      | reports (such as piloting forms, done independently,     |
| 5  | process            |                      | in duplicate), any processes for obtaining and           |
| 6  |                    |                      | confirming data from investigators                       |
| 7  |                    |                      |                                                          |
| 8  | Data items         | <a href="#">#12</a>  | List and define all variables for which data will be     |
| 9  |                    |                      | sought (such as PICO items, funding sources), any        |
| 10 |                    |                      | pre-planned data assumptions and simplifications         |
| 11 | Outcomes and       | <a href="#">#13</a>  | List and define all outcomes for which data will be      |
| 12 | prioritization     |                      | sought, including prioritization of main and             |
| 13 |                    |                      | additional outcomes, with rationale                      |
| 14 | Risk of bias in    | <a href="#">#14</a>  | Describe anticipated methods for assessing risk of       |
| 15 | individual studies |                      | bias of individual studies, including whether this       |
| 16 |                    |                      | will be done at the outcome or study level, or both;     |
| 17 |                    |                      | state how this information will be used in data          |
| 18 |                    |                      | synthesis                                                |
| 19 |                    |                      |                                                          |
| 20 | Data synthesis     | <a href="#">#15a</a> | Describe criteria under which study data will be         |
| 21 |                    |                      | quantitatively synthesised                               |
| 22 |                    | <a href="#">#15b</a> | If data are appropriate for quantitative synthesis,      |
| 23 |                    |                      | describe planned summary measures, methods of            |
| 24 |                    |                      | handling data and methods of combining data from         |
| 25 |                    |                      | studies, including any planned exploration of            |
| 26 |                    |                      | consistency (such as I <sup>2</sup> , Kendall's $\tau$ ) |
| 27 |                    | <a href="#">#15c</a> | Describe any proposed additional analyses (such as       |
| 28 |                    |                      | sensitivity or subgroup analyses, meta-regression)       |
| 29 |                    | <a href="#">#15d</a> | If quantitative synthesis is not appropriate, describe   |
| 30 |                    |                      | the type of summary planned                              |
| 31 |                    |                      |                                                          |
| 32 | Meta-bias(es)      | <a href="#">#16</a>  | Specify any planned assessment of meta-bias(es)          |
| 33 |                    |                      | (such as publication bias across studies, selective      |
| 34 |                    |                      | reporting within studies)                                |
| 35 |                    |                      |                                                          |
| 36 | Confidence in      | <a href="#">#17</a>  | Describe how the strength of the body of evidence        |
| 37 | cumulative         |                      | will be assessed (such as GRADE)                         |
| 38 | evidence           |                      |                                                          |

The PRISMA-P checklist is distributed under the terms of the Creative Commons Attribution License CC-BY 4.0. This checklist can be completed online using <https://www.goodreports.org/>, a tool made by the [EQUATOR Network](#) in collaboration with [Penelope.ai](#)

Appendix 3.

Quality assessment template for cross-sectional study based on Newcastle-Ottawa-Scale (NOS)

| Study number | Author | Year | Selection Bias Assessment (Maximum 5 stars) |       |             |       |                 |       |                                             |       | Comparability (Maximum 2 stars)    |       | Outcome (Maximum 3 stars) |       |                  |       | Total score (Maximum 10 stars) |
|--------------|--------|------|---------------------------------------------|-------|-------------|-------|-----------------|-------|---------------------------------------------|-------|------------------------------------|-------|---------------------------|-------|------------------|-------|--------------------------------|
|              |        |      | Representativeness of the sample            |       | Sample size |       | Non-respondents |       | Ascertainment of the exposure (risk factor) |       | Confounding factors are controlled |       | Assessment of the outcome |       | Statistical Test |       |                                |
|              |        |      | selection                                   | score | selection   | score | selection       | score | selection                                   | score | selection                          | score | selection                 | score | selection        | score |                                |
|              |        |      |                                             |       |             |       |                 |       |                                             |       |                                    |       |                           |       |                  |       |                                |
|              |        |      |                                             |       |             |       |                 |       |                                             |       |                                    |       |                           |       |                  |       |                                |

1  
2  
3  
4  
5  
6  
7  
8  
9  
10  
11  
12  
13  
14  
15  
16  
17  
18  
19  
20  
21  
22  
23  
24  
25  
26  
27  
28  
29  
30  
31  
32  
33  
34  
35  
36  
37  
38  
39  
40  
41  
42  
43  
44  
45  
46  
47

Quality assessment template for cohort study based on Newcastle-Ottawa-Scale (NOS)

| Study number | Author | Year | Selection Bias Assessment (Maximum 4 stars) |       |                                     |       |                           |       |                                                                          |       | Comparability (Maximum 2 stars)                                 |       | Outcome (Maximum 3 stars) |       |                                                 |       |                                  |       | Total score (Maximum 10 stars) |
|--------------|--------|------|---------------------------------------------|-------|-------------------------------------|-------|---------------------------|-------|--------------------------------------------------------------------------|-------|-----------------------------------------------------------------|-------|---------------------------|-------|-------------------------------------------------|-------|----------------------------------|-------|--------------------------------|
|              |        |      | Representativeness of the exposed cohort    |       | Selection of the non-exposed cohort |       | Ascertainment of exposure |       | Demonstration that outcome of interest was not present at start of study |       | Comparability of cohorts on the basis of the design or analysis |       | Assessment of the outcome |       | Was follow-up long enough for outcomes to occur |       | Adequacy of follow up of cohorts |       |                                |
|              |        |      | selection                                   | score | selection                           | score | selection                 | score | selection                                                                | score | selection                                                       | score | selection                 | score | selection                                       | score | selection                        | score |                                |
|              |        |      |                                             |       |                                     |       |                           |       |                                                                          |       |                                                                 |       |                           |       |                                                 |       |                                  |       |                                |
|              |        |      |                                             |       |                                     |       |                           |       |                                                                          |       |                                                                 |       |                           |       |                                                 |       |                                  |       |                                |



Quality assessment template for case-control study based on Newcastle-Ottawa-Scale (NOS)

| Study number | Author | Year | Selection Bias Assessment (Maximum 4 stars) |       |                                 |       |                       |       |                        |       | Comparability (Maximum 2 stars)                                            |       | Outcome (Maximum 3 stars)  |       |                                                     |       | Total score (Maximum 10 stars) |                   |       |
|--------------|--------|------|---------------------------------------------|-------|---------------------------------|-------|-----------------------|-------|------------------------|-------|----------------------------------------------------------------------------|-------|----------------------------|-------|-----------------------------------------------------|-------|--------------------------------|-------------------|-------|
|              |        |      | Is the case definition adequate?            |       | Representativeness of the cases |       | Selection of controls |       | Definition of controls |       | Comparability of cases and controls on the basis of the design or analysis |       | Assessment of the exposure |       | Same method of ascertainment for cases and controls |       |                                | Non-response rate |       |
|              |        |      | selection                                   | score | selection                       | score | selection             | score | selection              | score | selection                                                                  | score | selection                  | score | selection                                           | score |                                | selection         | score |
|              |        |      |                                             |       |                                 |       |                       |       |                        |       |                                                                            |       |                            |       |                                                     |       |                                |                   |       |
|              |        |      |                                             |       |                                 |       |                       |       |                        |       |                                                                            |       |                            |       |                                                     |       |                                |                   |       |

Peer review only
