# Supplementary material for: Relationship between serum osteocalcin/undercarboxylated osteocalcin and type 2 diabetes: a systematic review/meta-analysis study protocol
Source: PubMed Central journal article supplement — BMJ Open. 2019 Mar 12;9(3):e023918. doi: 10.1136/bmjopen-2018-023918 (PMC6429918; doi:10.1136/bmjopen-2018-023918), 2019-03-12
Supplement: bmjopen-2018-023918supp001.pdf [file bmjopen-2018-023918supp001.pdf]

## Appendix 1.

The scope search strategy to identify the trial study being published after 2015.

| ▼ Search History (19)    |     |                                                                                      |                 |
|--------------------------|-----|--------------------------------------------------------------------------------------|-----------------|
| <input type="checkbox"/> | # ▲ | Searches                                                                             | Results Type    |
| <input type="checkbox"/> | 1   | exp osteocalcin/                                                                     | 9689 Advanced   |
| <input type="checkbox"/> | 2   | osteocalcin.mp.                                                                      | 16198 Advanced  |
| <input type="checkbox"/> | 3   | bone gla protein.mp.                                                                 | 631 Advanced    |
| <input type="checkbox"/> | 4   | 1 or 2 or 3                                                                          | 16354 Advanced  |
| <input type="checkbox"/> | 5   | exp diabetes mellitus, Type 2/                                                       | 119103 Advanced |
| <input type="checkbox"/> | 6   | diabetes mellitus type 2.mp.                                                         | 119425 Advanced |
| <input type="checkbox"/> | 7   | (T2D* or NIDDM or "type 2" or "type II").tw.                                         | 229963 Advanced |
| <input type="checkbox"/> | 8   | (noninsulin\$ depend\$ or non insulin?depend\$ or noninsulin?depend\$).tw.           | 1409 Advanced   |
| <input type="checkbox"/> | 9   | exp hyperglycemia/                                                                   | 33658 Advanced  |
| <input type="checkbox"/> | 10  | hyperglycemia.mp.                                                                    | 47853 Advanced  |
| <input type="checkbox"/> | 11  | hypergly?emi*.tw.                                                                    | 39454 Advanced  |
| <input type="checkbox"/> | 12  | exp Hemoglobin A/ or exp Hemoglobin A, Glycosylated/                                 | 35398 Advanced  |
| <input type="checkbox"/> | 13  | HbA1c.mp.                                                                            | 22933 Advanced  |
| <input type="checkbox"/> | 14  | ("HbA(1c)" or HbA1c or "HbA 1c" or ((glycosylated or glycated) adj h?emoglobin)).tw. | 35894 Advanced  |
| <input type="checkbox"/> | 15  | 5 or 6 or 7 or 8 or 9 or 10 or 11 or 12 or 13 or 14                                  | 332918 Advanced |
| <input type="checkbox"/> | 16  | 4 and 15                                                                             | 662 Advanced    |
| <input type="checkbox"/> | 17  | limit 16 to humans                                                                   | 453 Advanced    |
| <input type="checkbox"/> | 18  | limit 17 to yr="2015 -Current"                                                       | 125 Advanced    |
| <input type="checkbox"/> | 19  | limit 18 to (clinical study or randomized controlled trial)                          | 6 Advanced      |
