# Supplementary material for: Relationship between serum osteocalcin/undercarboxylated osteocalcin and type 2 diabetes: a systematic review/meta-analysis study protocol
Source: PubMed Central journal article supplement — BMJ Open. 2019 Mar 12;9(3):e023918. doi: 10.1136/bmjopen-2018-023918 (PMC6429918; doi:10.1136/bmjopen-2018-023918), 2019-03-12
Supplement: bmjopen-2018-023918supp003.pdf [file bmjopen-2018-023918supp003.pdf]

Quality assessment template for case-control study based on Newcastle-Ottawa-Scale (NOS)

| Study number | Author | Year | Selection Bias Assessment (Maximum 4 stars) |       |                                 |       |                       |       |                        |       | Comparability (Maximum 2 stars)                                            |       | Outcome (Maximum 3 stars)  |       |                                                     |       |                   |       | Total score (Maximum 10 stars) |           |
|--------------|--------|------|---------------------------------------------|-------|---------------------------------|-------|-----------------------|-------|------------------------|-------|----------------------------------------------------------------------------|-------|----------------------------|-------|-----------------------------------------------------|-------|-------------------|-------|--------------------------------|-----------|
|              |        |      | Is the case definition adequate?            |       | Representativeness of the cases |       | Selection of controls |       | Definition of controls |       | Comparability of cases and controls on the basis of the design or analysis |       | Assessment of the exposure |       | Same method of ascertainment for cases and controls |       | Non-response rate |       |                                |           |
|              |        |      | selection                                   | score | selection                       | score | selection             | score | selection              | score | selection                                                                  | score | selection                  | score | selection                                           | score | selection         | score |                                | selection |
|              |        |      |                                             |       |                                 |       |                       |       |                        |       |                                                                            |       |                            |       |                                                     |       |                   |       |                                |           |
|              |        |      |                                             |       |                                 |       |                       |       |                        |       |                                                                            |       |                            |       |                                                     |       |                   |       |                                |           |
